# Supplementary material for: The Adhesion GPCR VLGR1/ADGRV1 Regulates the Ca2+ Homeostasis at Mitochondria-Associated ER Membranes
Source: Cells. 2022 Sep 7;11(18):2790. doi: 10.3390/cells11182790 (PMC9496679; doi:10.3390/cells11182790)
Supplement: Supplementary file 1 [file cells-11-02790-s001.zip › cells-1862176-Table S1.xls]

## Sheet: VLGR1CTF HEK preys
GOID	GOTerm	Nr. Genes	Associated Genes Found	Ontology Source	Term PValue	Term PValue Corrected with Bonferroni step down	Group PValue	Group PValue Corrected with Bonferroni step down	GOLevels	GOGroups	% Associated Genes
GO:0005622	intracellular	579	[AAAS, AASS, ABCB10, ABCB7, ABCB8, ABCC4, ACAD9, ACOT8, ACSL1, ADAM17, ADCK3, ADCK4, ADPGK, AGK, AGPAT1, AGPAT2, AGPAT3, AGPAT4, AGTRAP, ALDH1B1, ALG1, ALG10, ALG10B, ALG11, ALG14, ALG2, ALG3, ALG5, ALG6, ALG8, ALG9, AMFR, ANKLE2, ANKRD13A, ANO10, AP1G1, APBB1, APH1A, APMAP, APOO, APOOL, APP, ARL10, ARL5B, ARL6IP1, ARL6IP5, ARMCX3, ASNA1, ASPH, ATAD1, ATG9A, ATL2, ATL3, ATP11C, ATP1B3, ATP2B1, AT…	GO_CellularComponent-GOA_09.02.2016_16h18	2.4e-05	0.0027	2.8e-05	0.0012	[2, 3]	Group1	4.11046
GO:0044424	intracellular part	573	[AAAS, AASS, ABCB10, ABCB7, ABCB8, ABCC4, ACAD9, ACOT8, ACSL1, ADAM17, ADCK3, ADCK4, ADPGK, AGK, AGPAT1, AGPAT2, AGPAT3, AGPAT4, AGTRAP, ALDH1B1, ALG1, ALG10, ALG10B, ALG11, ALG14, ALG2, ALG3, ALG5, ALG6, ALG8, ALG9, AMFR, ANKLE2, ANKRD13A, AP1G1, APBB1, APH1A, APMAP, APOO, APOOL, APP, ARL6IP1, ARL6IP5, ARMCX3, ASNA1, ASPH, ATAD1, ATG9A, ATL2, ATL3, ATP11C, ATP1B3, ATP2B1, ATP2C1, ATP5I, ATP6AP1,…	GO_CellularComponent-GOA_09.02.2016_16h18	2.1e-06	0.00025	2.8e-05	0.0012	[2, 3, 4]	Group1	4.16727
GO:0005737	cytoplasm	553	[AAAS, AASS, ABCB10, ABCB7, ABCB8, ABCC4, ACAD9, ACOT8, ACSL1, ADAM17, ADCK3, ADCK4, ADPGK, AGK, AGPAT1, AGPAT2, AGPAT3, AGPAT4, AGTRAP, ALDH1B1, ALG1, ALG10, ALG10B, ALG11, ALG14, ALG2, ALG3, ALG5, ALG6, ALG8, ALG9, AMFR, ANKLE2, ANKRD13A, AP1G1, APBB1, APH1A, APMAP, APOO, APOOL, APP, ARL6IP1, ARL6IP5, ARMCX3, ASNA1, ASPH, ATAD1, ATG9A, ATL2, ATL3, ATP11C, ATP1B3, ATP2C1, ATP5I, ATP6AP1, ATP6V0A…	GO_CellularComponent-GOA_09.02.2016_16h18	6.4e-33	1e-30	2.8e-05	0.0012	[3, 4, 5]	Group1	5.14323
GO:0043229	intracellular organelle	550	[AAAS, AASS, ABCB10, ABCB7, ABCB8, ABCC4, ACAD9, ACOT8, ACSL1, ADAM17, ADCK3, ADCK4, ADPGK, AGK, AGPAT1, AGPAT2, AGPAT3, AGPAT4, AGTRAP, ALDH1B1, ALG1, ALG10, ALG10B, ALG11, ALG14, ALG2, ALG3, ALG5, ALG6, ALG8, ALG9, AMFR, ANKLE2, ANKRD13A, AP1G1, APBB1, APH1A, APMAP, APOO, APOOL, APP, ARL6IP1, ARL6IP5, ARMCX3, ASNA1, ASPH, ATAD1, ATG9A, ATL2, ATL3, ATP11C, ATP1B3, ATP2B1, ATP2C1, ATP5I, ATP6AP1,…	GO_CellularComponent-GOA_09.02.2016_16h18	9.2e-16	1.4e-13	2.8e-05	0.0012	[2, 3, 4, 5]	Group1	4.58257
GO:0043231	intracellular membrane-bounded organelle	544	[AAAS, AASS, ABCB10, ABCB7, ABCB8, ABCC4, ACAD9, ACOT8, ACSL1, ADCK3, ADCK4, ADPGK, AGK, AGPAT1, AGPAT2, AGPAT3, AGPAT4, AGTRAP, ALDH1B1, ALG1, ALG10, ALG10B, ALG11, ALG14, ALG2, ALG3, ALG5, ALG6, ALG8, ALG9, AMFR, ANKLE2, ANKRD13A, AP1G1, APBB1, APH1A, APMAP, APOO, APOOL, APP, ARL6IP1, ARL6IP5, ARMCX3, ASNA1, ASPH, ATAD1, ATG9A, ATL2, ATL3, ATP11C, ATP1B3, ATP2B1, ATP2C1, ATP5I, ATP6AP1, ATP6V0A…	GO_CellularComponent-GOA_09.02.2016_16h18	3.3e-26	5.5e-24	2.8e-05	0.0012	[3, 4, 5, 6]	Group1	4.96758
GO:0031224	intrinsic component of membrane	524	[ABCB10, ABCB7, ABCB8, ABCC1, ABCC4, ABHD12, ABHD16A, ACSL1, ADAM17, ADCK3, ADCK4, ADPGK, AGPAT1, AGPAT2, AGPAT3, AGPAT4, AGTRAP, AIG1, ALG1, ALG10, ALG10B, ALG11, ALG14, ALG2, ALG3, ALG5, ALG6, ALG8, ALG9, AMFR, ANKLE2, ANO10, APH1A, APMAP, APOO, APOOL, APP, ARL10, ARL6IP1, ARL6IP5, ARL6IP6, ARMCX3, ASPH, ATG9A, ATL2, ATL3, ATP11C, ATP1B3, ATP2B1, ATP2C1, ATP6AP1, ATP6AP2, ATP6V0A1, ATP6V0A2, AT…	GO_CellularComponent-GOA_09.02.2016_16h18	2.9e-119	5.4e-117	2.9e-119	1.9e-117	[2, 3]	Group4	8.57891
GO:0016021	integral component of membrane	524	[ABCB10, ABCB7, ABCB8, ABCC1, ABCC4, ABHD12, ABHD16A, ACSL1, ADAM17, ADCK3, ADCK4, ADPGK, AGPAT1, AGPAT2, AGPAT3, AGPAT4, AGTRAP, AIG1, ALG1, ALG10, ALG10B, ALG11, ALG14, ALG2, ALG3, ALG5, ALG6, ALG8, ALG9, AMFR, ANKLE2, ANO10, APH1A, APMAP, APOO, APOOL, APP, ARL10, ARL6IP1, ARL6IP5, ARL6IP6, ARMCX3, ASPH, ATG9A, ATL2, ATL3, ATP11C, ATP1B3, ATP2B1, ATP2C1, ATP6AP1, ATP6AP2, ATP6V0A1, ATP6V0A2, AT…	GO_CellularComponent-GOA_09.02.2016_16h18	5.5e-123	1e-120	2.9e-119	1.9e-117	[3, 4]	Group4	8.73188
GO:0044444	cytoplasmic part	520	[AASS, ABCB10, ABCB7, ABCB8, ABCC4, ACAD9, ACOT8, ACSL1, ADCK3, ADCK4, ADPGK, AGK, AGPAT1, AGPAT2, AGPAT3, AGPAT4, AGTRAP, ALDH1B1, ALG1, ALG10, ALG10B, ALG11, ALG14, ALG2, ALG3, ALG5, ALG6, ALG8, ALG9, AMFR, ANKLE2, ANKRD13A, AP1G1, APBB1, APH1A, APMAP, APOO, APOOL, APP, ARL6IP1, ARL6IP5, ARMCX3, ASNA1, ASPH, ATAD1, ATG9A, ATL2, ATL3, ATP11C, ATP1B3, ATP2C1, ATP5I, ATP6AP1, ATP6V0A1, ATP6V0A2, A…	GO_CellularComponent-GOA_09.02.2016_16h18	3.9e-61	7e-59	2.8e-05	0.0012	[3, 4, 5, 6]	Group1	6.34688
GO:0044446	intracellular organelle part	488	[AAAS, AASS, ABCB10, ABCB7, ABCB8, ABCC4, ACAD9, ACOT8, ACSL1, ADCK4, AGK, AGPAT1, AGPAT2, AGPAT3, AGPAT4, AGTRAP, ALDH1B1, ALG1, ALG10, ALG10B, ALG11, ALG14, ALG2, ALG3, ALG5, ALG6, ALG8, ALG9, AMFR, ANKLE2, AP1G1, APBB1, APH1A, APOO, APOOL, APP, ARL6IP1, ARL6IP5, ARMCX3, ASNA1, ASPH, ATAD1, ATG9A, ATL2, ATL3, ATP11C, ATP2C1, ATP5I, ATP6AP1, ATP6V0A1, ATP6V0A2, ATP6V0D1, ATP6V1F, ATP6V1H, ATP7B,…	GO_CellularComponent-GOA_09.02.2016_16h18	1.4e-45	2.5e-43	2.8e-05	0.0012	[2, 3, 4, 5, 6]	Group1	6.03139
GO:0031090	organelle membrane	436	[AAAS, ABCB10, ABCB7, ABCB8, ABCC4, ACAD9, ACSL1, ADCK4, AGK, AGPAT1, AGPAT2, AGPAT3, AGPAT4, AGTRAP, ALG1, ALG10, ALG10B, ALG11, ALG14, ALG2, ALG3, ALG5, ALG6, ALG8, ALG9, AMFR, ANKLE2, AP1G1, APH1A, APOO, APOOL, APP, ARL6IP1, ARL6IP5, ARMCX3, ASNA1, ASPH, ATAD1, ATG9A, ATL2, ATL3, ATP11C, ATP2C1, ATP5I, ATP6AP1, ATP6V0A1, ATP6V0A2, ATP6V0D1, ATP6V1F, ATP6V1H, ATP7B, AUP1, B3GAT3, B4GALT7, BAX, …	GO_CellularComponent-GOA_09.02.2016_16h18	6.1e-165	1.1e-162	2.8e-05	0.0012	[2, 3]	Group1	13.6892
GO:0012505	endomembrane system	367	[AAAS, ABCC4, ACSL1, ADPGK, AGPAT1, AGPAT2, AGPAT3, AGPAT4, AGTRAP, ALG1, ALG10, ALG10B, ALG11, ALG14, ALG2, ALG3, ALG5, ALG6, ALG8, ALG9, AMFR, ANKLE2, ANKRD13A, AP1G1, APH1A, APMAP, APOO, APP, ARL6IP1, ARL6IP5, ASNA1, ASPH, ATG9A, ATL2, ATL3, ATP11C, ATP2C1, ATP6AP1, ATP6V0A1, ATP6V0A2, ATP6V0D1, ATP7B, AUP1, B3GAT3, B4GALT7, BAX, BET1, BNIP1, BSCL2, C3orf58, CADM1, CDC42EP1, CDIPT, CDKAL1, CDS…	GO_CellularComponent-GOA_09.02.2016_16h18	1.8e-78	3.3e-76	2.8e-05	0.0012	[2, 3]	Group1	9.45633
GO:0098588	bounding membrane of organelle	344	[ABCC4, ACSL1, AGK, AGPAT1, AGPAT2, AGPAT3, AGPAT4, AGTRAP, ALG1, ALG10, ALG10B, ALG11, ALG14, ALG2, ALG3, ALG5, ALG6, ALG8, ALG9, AMFR, ANKLE2, AP1G1, APH1A, APOO, APP, ARL6IP1, ARL6IP5, ARMCX3, ASNA1, ASPH, ATAD1, ATG9A, ATL2, ATL3, ATP11C, ATP2C1, ATP6AP1, ATP6V0A1, ATP6V0A2, ATP6V0D1, ATP6V1F, ATP6V1H, ATP7B, AUP1, B3GAT3, B4GALT7, BAX, BET1, BNIP1, BRI3BP, BSCL2, C3orf58, CDIPT, CDKAL1, CDS2…	GO_CellularComponent-GOA_09.02.2016_16h18	9e-125	1.7e-122	2.8e-05	0.0012	[3, 4]	Group1	14.2679
GO:0005783	endoplasmic reticulum	257	[ACSL1, ADPGK, AGPAT1, AGPAT2, AGPAT3, AGPAT4, AGTRAP, ALG1, ALG10, ALG10B, ALG11, ALG14, ALG2, ALG3, ALG5, ALG6, ALG8, ALG9, AMFR, ANKLE2, APH1A, APMAP, APOO, APP, ARL6IP1, ARL6IP5, ASNA1, ASPH, ATG9A, ATL2, ATL3, ATP11C, AUP1, BAX, BET1, BNIP1, BSCL2, CDIPT, CDKAL1, CDS2, CEPT1, CERS1, CERS2, CERS4, CERS5, CERS6, CHP1, CISD2, CLN6, CYP51A1, DAD1, DDRGK1, DERL1, DERL2, DGAT1, DHCR24, DHCR7, DHRS…	GO_CellularComponent-GOA_09.02.2016_16h18	2.5e-93	4.6e-91	2.8e-05	0.0012	[3, 4, 5, 6, 7]	Group1	15.1891
GO:0044432	endoplasmic reticulum part	232	[ACSL1, AGPAT1, AGPAT2, AGPAT3, AGPAT4, AGTRAP, ALG1, ALG10, ALG10B, ALG11, ALG14, ALG2, ALG3, ALG5, ALG6, ALG8, ALG9, AMFR, ANKLE2, APH1A, APOO, ARL6IP1, ARL6IP5, ASNA1, ASPH, ATG9A, ATL2, ATL3, ATP11C, AUP1, BAX, BET1, BNIP1, BSCL2, CDIPT, CDKAL1, CDS2, CEPT1, CERS1, CERS2, CERS4, CERS5, CERS6, CISD2, CLN6, CYP51A1, DAD1, DDRGK1, DERL1, DERL2, DGAT1, DHCR24, DHCR7, DHRS3, DHRS7B, DNAJB14, DNAJC…	GO_CellularComponent-GOA_09.02.2016_16h18	5.5e-107	1e-104	2.8e-05	0.0012	[3, 4, 5, 6, 7, 8]	Group1	19.6112
GO:0042175	nuclear outer membrane-endoplasmic reticulum membrane network	227	[ACSL1, AGPAT1, AGPAT2, AGPAT3, AGPAT4, AGTRAP, ALG1, ALG10, ALG10B, ALG11, ALG14, ALG2, ALG3, ALG5, ALG6, ALG8, ALG9, AMFR, ANKLE2, APH1A, APOO, ARL6IP1, ARL6IP5, ASNA1, ASPH, ATG9A, ATL2, ATL3, ATP11C, AUP1, BAX, BET1, BNIP1, BSCL2, CDIPT, CDKAL1, CDS2, CEPT1, CERS1, CERS2, CERS4, CERS5, CERS6, CISD2, CLN6, CYP51A1, DAD1, DDRGK1, DERL1, DERL2, DGAT1, DHCR24, DHCR7, DHRS3, DHRS7B, DNAJB14, DNAJC…	GO_CellularComponent-GOA_09.02.2016_16h18	1e-117	1.9e-115	2.8e-05	0.0012	[2, 3, 4]	Group1	22.4752
GO:0005789	endoplasmic reticulum membrane	227	[ACSL1, AGPAT1, AGPAT2, AGPAT3, AGPAT4, AGTRAP, ALG1, ALG10, ALG10B, ALG11, ALG14, ALG2, ALG3, ALG5, ALG6, ALG8, ALG9, AMFR, ANKLE2, APH1A, APOO, ARL6IP1, ARL6IP5, ASNA1, ASPH, ATG9A, ATL2, ATL3, ATP11C, AUP1, BAX, BET1, BNIP1, BSCL2, CDIPT, CDKAL1, CDS2, CEPT1, CERS1, CERS2, CERS4, CERS5, CERS6, CISD2, CLN6, CYP51A1, DAD1, DDRGK1, DERL1, DERL2, DGAT1, DHCR24, DHCR7, DHRS3, DHRS7B, DNAJB14, DNAJC…	GO_CellularComponent-GOA_09.02.2016_16h18	8.2e-120	1.5e-117	2.8e-05	0.0012	[2, 3, 4, 5, 6, 7, 8, 9]	Group1	22.9525
GO:0031988	membrane-bounded vesicle	177	[ABCC1, ABCC4, AGTRAP, AP1G1, APMAP, APP, ARL6IP5, ASNA1, ATP1B3, ATP2B1, ATP6AP1, ATP6AP2, ATP6V0A1, ATP6V0A2, ATP6V0D1, ATP6V1F, ATP6V1H, ATP7B, AUP1, B3GAT3, BAX, BET1, C3orf58, CADM1, CHCHD3, CHP1, CHST14, CISD1, CLCN3, COMT, COX4I1, CPD, CXADR, DAD1, DNAJB4, DNAJC11, DNAJC5, DPAGT1, EFNB1, ENDOD1, ERP44, EXTL2, FAM213A, FAM3C, FNDC3A, FUCA2, GALK1, GALNT2, GHITM, GJA1, GLA, GOLGA5, GOLIM4, G…	GO_CellularComponent-GOA_09.02.2016_16h18	0.00049	0.045	0.0001	0.0041	[3]	Group14	4.8124
GO:0005739	mitochondrion	157	[AASS, ABCB10, ABCB7, ABCB8, ACAD9, ACOT8, ACSL1, ADCK3, ADCK4, AGK, ALDH1B1, APOO, APOOL, ARMCX3, ATAD1, ATP5I, ATP7B, BAG5, BAX, BCS1L, BNIP1, BRI3BP, C19orf70, C2orf47, CDS2, CHCHD3, CHPF, CISD1, CISD2, COA3, COMT, COQ5, COX15, COX4I1, COX6C, COX7B, CPT1A, CYB5B, CYC1, DCAKD, DNAJC11, DNAJC30, DNAJC5, EARS2, ECSIT, EMC2, EMC8, FAM213A, FASTKD1, FASTKD5, FDPS, FLVCR1, GCAT, GCDH, GHITM, GJA1, G…	GO_CellularComponent-GOA_09.02.2016_16h18	3.1e-24	5.1e-22	1.7e-31	1.1e-29	[4, 5, 6, 7]	Group62	8.74652
GO:0031975	envelope	151	[AAAS, ABCB10, ABCB7, ABCB8, ACAD9, ACSL1, ADCK4, AGK, AGPAT3, ALG14, APOO, APOOL, APP, ARMCX3, ATP5I, BAX, BCS1L, BNIP1, BRI3BP, C19orf70, CDS2, CEPT1, CERS2, CERS4, CERS5, CERS6, CHCHD3, CISD1, CISD2, COA3, COQ5, COX15, COX4I1, COX6C, COX7B, CPT1A, CYB5B, CYC1, DHCR7, DNAJC1, DNAJC11, DPY19L1, ECSIT, EI24, FLVCR1, GCDH, GHDC, GHITM, GJA1, GPD2, HIGD1A, HK2, IDH2, IGF2R, IPO13, LEMD2, LEMD3, LET…	GO_CellularComponent-GOA_09.02.2016_16h18	1e-42	1.8e-40	1.7e-31	1.1e-29	[2, 3]	Group62	12.9725
GO:0031967	organelle envelope	151	[AAAS, ABCB10, ABCB7, ABCB8, ACAD9, ACSL1, ADCK4, AGK, AGPAT3, ALG14, APOO, APOOL, APP, ARMCX3, ATP5I, BAX, BCS1L, BNIP1, BRI3BP, C19orf70, CDS2, CEPT1, CERS2, CERS4, CERS5, CERS6, CHCHD3, CISD1, CISD2, COA3, COQ5, COX15, COX4I1, COX6C, COX7B, CPT1A, CYB5B, CYC1, DHCR7, DNAJC1, DNAJC11, DPY19L1, ECSIT, EI24, FLVCR1, GCDH, GHDC, GHITM, GJA1, GPD2, HIGD1A, HK2, IDH2, IGF2R, IPO13, LEMD2, LEMD3, LET…	GO_CellularComponent-GOA_09.02.2016_16h18	6.6e-43	1.1e-40	1.7e-31	1.1e-29	[3, 4, 5, 6, 7]	Group62	13.0172
GO:0005794	Golgi apparatus	134	[AGTRAP, AP1G1, APH1A, APOO, APP, ATG9A, ATP2C1, ATP6V0A1, ATP7B, B3GAT3, B4GALT7, BET1, C3orf58, CDC42EP1, CDIPT, CERS1, CHP1, CHPF, CHPT1, CHST14, CLCN3, CPD, DHCR24, EI24, ERGIC1, ERGIC2, ERGIC3, FAM3C, FNDC3A, GALNT1, GALNT2, GCC2, GJA1, GLA, GLT8D1, GOLGA5, GOLIM4, GOLM1, GOLT1B, GORASP2, GOSR1, GOSR2, GPR107, GPR89A, HLA-B, HS2ST1, IER3IP1, IGF2R, IMPAD1, ITM2B, ITM2C, JAM3, KDELR1, KDELR2,…	GO_CellularComponent-GOA_09.02.2016_16h18	3.5e-21	5.6e-19	1.2e-15	7.5e-14	[3, 4, 5, 6, 7]	Group30	8.89184
GO:0043230	extracellular organelle	131	[ABCC1, APMAP, APP, ARL6IP5, ASNA1, ATP1B3, ATP2B1, ATP6AP1, ATP6AP2, ATP6V0A1, ATP6V0D1, ATP6V1F, ATP6V1H, AUP1, B3GAT3, BAX, CADM1, CHCHD3, CHP1, CHST14, CISD1, COMT, COX4I1, CPD, DAD1, DNAJB4, DNAJC11, DNAJC5, DPAGT1, EFNB1, ENDOD1, ERP44, EXTL2, FAM213A, FAM3C, FUCA2, GALK1, GALNT2, GHITM, GJA1, GLA, GOLM1, GOLT1B, GPR180, HLA-B, IDH2, IGF2R, ITM2B, ITM2C, KDELR2, LAMP2, LAMTOR1, LMAN1, LMAN2…	GO_CellularComponent-GOA_09.02.2016_16h18	0.025	1	0.0001	0.0041	[2, 3]	Group14	4.54388
GO:1903561	extracellular vesicle	131	[ABCC1, APMAP, APP, ARL6IP5, ASNA1, ATP1B3, ATP2B1, ATP6AP1, ATP6AP2, ATP6V0A1, ATP6V0D1, ATP6V1F, ATP6V1H, AUP1, B3GAT3, BAX, CADM1, CHCHD3, CHP1, CHST14, CISD1, COMT, COX4I1, CPD, DAD1, DNAJB4, DNAJC11, DNAJC5, DPAGT1, EFNB1, ENDOD1, ERP44, EXTL2, FAM213A, FAM3C, FUCA2, GALK1, GALNT2, GHITM, GJA1, GLA, GOLM1, GOLT1B, GPR180, HLA-B, IDH2, IGF2R, ITM2B, ITM2C, KDELR2, LAMP2, LAMTOR1, LMAN1, LMAN2…	GO_CellularComponent-GOA_09.02.2016_16h18	0.025	1	0.0001	0.0041	[2, 3, 4]	Group14	4.54388
GO:0065010	extracellular membrane-bounded organelle	130	[ABCC1, APMAP, APP, ARL6IP5, ASNA1, ATP1B3, ATP2B1, ATP6AP1, ATP6AP2, ATP6V0A1, ATP6V0D1, ATP6V1F, ATP6V1H, AUP1, B3GAT3, BAX, CADM1, CHCHD3, CHP1, CHST14, CISD1, COMT, COX4I1, CPD, DAD1, DNAJB4, DNAJC11, DNAJC5, DPAGT1, EFNB1, ENDOD1, ERP44, EXTL2, FAM213A, FAM3C, FUCA2, GALK1, GALNT2, GHITM, GJA1, GLA, GOLM1, GOLT1B, GPR180, HLA-B, IDH2, IGF2R, ITM2B, ITM2C, KDELR2, LAMP2, LAMTOR1, LMAN1, LMAN2…	GO_CellularComponent-GOA_09.02.2016_16h18	0.028	1	0.0001	0.0041	[3, 4]	Group14	4.5312
GO:0070062	extracellular exosome	130	[ABCC1, APMAP, APP, ARL6IP5, ASNA1, ATP1B3, ATP2B1, ATP6AP1, ATP6AP2, ATP6V0A1, ATP6V0D1, ATP6V1F, ATP6V1H, AUP1, B3GAT3, BAX, CADM1, CHCHD3, CHP1, CHST14, CISD1, COMT, COX4I1, CPD, DAD1, DNAJB4, DNAJC11, DNAJC5, DPAGT1, EFNB1, ENDOD1, ERP44, EXTL2, FAM213A, FAM3C, FUCA2, GALK1, GALNT2, GHITM, GJA1, GLA, GOLM1, GOLT1B, GPR180, HLA-B, IDH2, IGF2R, ITM2B, ITM2C, KDELR2, LAMP2, LAMTOR1, LMAN1, LMAN2…	GO_CellularComponent-GOA_09.02.2016_16h18	0.028	1	0.0001	0.0041	[3, 4, 5]	Group14	4.5312
GO:0044429	mitochondrial part	122	[AASS, ABCB10, ABCB7, ABCB8, ACAD9, ACSL1, ADCK4, AGK, ALDH1B1, APOO, APOOL, ARMCX3, ATP5I, BAX, BCS1L, BRI3BP, C19orf70, CDS2, CHCHD3, CHPF, CISD1, CISD2, COA3, COQ5, COX15, COX4I1, COX6C, COX7B, CPT1A, CYB5B, CYC1, DNAJC11, EARS2, ECSIT, FASTKD5, FLVCR1, GCDH, GHITM, GJA1, GPD2, HIGD1A, HK2, IDH2, LETM1, LETMD1, MAVS, MCL1, MCU, MFN1, MON2, MPC2, MTCH1, MTFP1, MTX1, NDUFA11, NDUFA13, NDUFA4, ND…	GO_CellularComponent-GOA_09.02.2016_16h18	7.4e-31	1.2e-28	5.8e-20	3.5e-18	[3, 4, 5, 6, 7, 8]	Group42	12.0079
GO:0098796	membrane protein complex	116	[ABCB8, ABHD12, AMFR, AP1G1, APOO, APOOL, ARL6IP1, ASPH, ATP1B3, ATP5I, ATP6AP1, ATP6V0A1, ATP6V0A2, ATP6V0D1, ATP6V1F, ATP6V1H, AUP1, BAX, BCS1L, BNIP1, C19orf70, C3orf58, CHCHD3, CHRNA5, COX4I1, COX7B, DAD1, DERL1, EMC1, EMC10, EMC2, EMC3, EMC4, EMC6, EMC7, EMC8, GJA1, GOSR1, GPAA1, HERPUD1, HLA-B, IGF2R, IRAK1, LAMP2, LAMTOR1, LRRC8A, MAGT1, MCU, MMGT1, MON2, NDUFA11, NDUFA13, NDUFA4, NDUFA5, …	GO_CellularComponent-GOA_09.02.2016_16h18	2.3e-25	4e-23	2.8e-10	1.6e-08	[2, 3]	Group46	10.8411
GO:0005740	mitochondrial envelope	113	[ABCB10, ABCB7, ABCB8, ACAD9, ACSL1, ADCK4, AGK, APOO, APOOL, ARMCX3, ATP5I, BAX, BCS1L, BRI3BP, C19orf70, CDS2, CHCHD3, CISD1, CISD2, COA3, COQ5, COX15, COX4I1, COX6C, COX7B, CPT1A, CYB5B, CYC1, DNAJC11, ECSIT, FLVCR1, GCDH, GHITM, GJA1, GPD2, HIGD1A, HK2, IDH2, LETM1, LETMD1, MAVS, MCL1, MCU, MFN1, MON2, MPC2, MTCH1, MTFP1, MTX1, NDUFA11, NDUFA13, NDUFA4, NDUFA5, NDUFA8, NDUFA9, NDUFAF1, NDUFAF…	GO_CellularComponent-GOA_09.02.2016_16h18	1.3e-37	2.3e-35	5.8e-20	3.5e-18	[4, 5, 6, 7, 8, 9]	Group42	15.0266
GO:0031966	mitochondrial membrane	113	[ABCB10, ABCB7, ABCB8, ACAD9, ACSL1, ADCK4, AGK, APOO, APOOL, ARMCX3, ATP5I, BAX, BCS1L, BRI3BP, C19orf70, CDS2, CHCHD3, CISD1, CISD2, COA3, COQ5, COX15, COX4I1, COX6C, COX7B, CPT1A, CYB5B, CYC1, DNAJC11, ECSIT, FLVCR1, GCDH, GHITM, GJA1, GPD2, HIGD1A, HK2, IDH2, LETM1, LETMD1, MAVS, MCL1, MCU, MFN1, MON2, MPC2, MTCH1, MTFP1, MTX1, NDUFA11, NDUFA13, NDUFA4, NDUFA5, NDUFA8, NDUFA9, NDUFAF1, NDUFAF…	GO_CellularComponent-GOA_09.02.2016_16h18	6.4e-40	1.1e-37	5.8e-20	3.5e-18	[3, 4, 5, 6, 7, 8, 9, 10]	Group42	15.8708
GO:0044431	Golgi apparatus part	99	[AGTRAP, AP1G1, APH1A, APOO, APP, ATG9A, ATP2C1, ATP7B, B3GAT3, B4GALT7, BET1, C3orf58, CDIPT, CERS1, CHP1, CHPF, CHPT1, CHST14, CLCN3, CPD, DHCR24, ERGIC1, FNDC3A, GALNT1, GALNT2, GCC2, GJA1, GOLGA5, GOLIM4, GOLT1B, GORASP2, GOSR1, GOSR2, GPR89A, HLA-B, HS2ST1, IGF2R, ITM2B, KDELR1, LMAN1, LMAN2, LMAN2L, LPCAT1, LPCAT2, M6PR, MAN1A1, MAN1A2, MANEA, MMGT1, NDFIP2, PKMYT1, PPP6C, PREB, PSEN1, QPCT…	GO_CellularComponent-GOA_09.02.2016_16h18	8.6e-22	1.3e-19	1.2e-15	7.5e-14	[3, 4, 5, 6, 7, 8]	Group30	10.9031
GO:0019866	organelle inner membrane	94	[ABCB10, ABCB7, ABCB8, ACAD9, APOO, APOOL, ATP5I, BCS1L, C19orf70, CDS2, CHCHD3, COA3, COQ5, COX15, COX4I1, COX6C, COX7B, CPT1A, CYB5B, CYC1, DNAJC11, DPY19L1, ECSIT, GCDH, GHITM, GPD2, HIGD1A, IDH2, LEMD2, LEMD3, LETM1, MCU, MON2, MPC2, MTCH1, MTFP1, MTX1, NDUFA11, NDUFA13, NDUFA4, NDUFA5, NDUFA8, NDUFA9, NDUFAF1, NDUFAF3, NDUFAF4, NDUFB10, NDUFB4, NDUFS1, NDUFS2, NDUFS3, NNT, NRM, OMA1, OXA1L, …	GO_CellularComponent-GOA_09.02.2016_16h18	7.1e-35	1.2e-32	5.8e-20	3.5e-18	[3, 4, 5, 6, 7, 8]	Group42	16.6667
GO:0000139	Golgi membrane	87	[AGTRAP, AP1G1, APH1A, APOO, APP, ATP2C1, ATP7B, B3GAT3, B4GALT7, BET1, C3orf58, CDIPT, CERS1, CHP1, CHPF, CHPT1, CHST14, CLCN3, DHCR24, ERGIC1, FNDC3A, GALNT1, GALNT2, GJA1, GOLGA5, GOLIM4, GOLT1B, GORASP2, GOSR1, GOSR2, GPR89A, HLA-B, HS2ST1, ITM2B, KDELR1, LMAN1, LMAN2, LMAN2L, LPCAT1, LPCAT2, MAN1A1, MAN1A2, MANEA, MMGT1, NDFIP2, PKMYT1, PPP6C, PREB, PSEN1, QPCTL, QSOX2, RER1, RHBDD2, RTN3, S…	GO_CellularComponent-GOA_09.02.2016_16h18	4.7e-23	7.6e-21	1.2e-15	7.5e-14	[4, 5, 6, 7, 8, 9]	Group30	12.4642
GO:0031410	cytoplasmic vesicle	85	[ABCC4, AGTRAP, AP1G1, APP, ATG9A, ATP1B3, ATP6V0A1, ATP6V0A2, ATP6V0D1, ATP7B, BET1, C3orf58, CADM1, CHP1, CLCN3, CXADR, DNAJC5, FAM3C, FNDC3A, GJA1, GOLGA5, GOLIM4, GOSR2, GPR107, GPR89A, HLA-B, IGF2R, ITM2B, KDELR1, LAMP2, LMAN1, LMAN2L, LNPEP, MFSD10, NCSTN, PI4K2A, PICALM, PIGT, PIK3R4, POMT1, PSEN1, RAB29, RAB32, SCAMP1, SCAMP2, SCAMP4, SCAP, SCARB1, SCFD1, SLC1A4, SLC30A5, SLC30A7, SMO, SO…	GO_CellularComponent-GOA_09.02.2016_16h18	1.2e-06	0.00015	0.0001	0.0041	[3, 4, 5, 6, 7]	Group14	6.48855
GO:0005743	mitochondrial inner membrane	85	[ABCB10, ABCB7, ABCB8, ACAD9, APOO, APOOL, ATP5I, BCS1L, C19orf70, CDS2, CHCHD3, COA3, COQ5, COX15, COX4I1, COX6C, COX7B, CPT1A, CYB5B, CYC1, DNAJC11, ECSIT, GCDH, GHITM, GPD2, HIGD1A, IDH2, LETM1, MCU, MON2, MPC2, MTCH1, MTFP1, MTX1, NDUFA11, NDUFA13, NDUFA4, NDUFA5, NDUFA8, NDUFA9, NDUFAF1, NDUFAF3, NDUFAF4, NDUFB10, NDUFB4, NDUFS1, NDUFS2, NDUFS3, NNT, OMA1, OXA1L, PAM16, PARL, PISD, PSEN1, PT…	GO_CellularComponent-GOA_09.02.2016_16h18	1.1e-31	1.9e-29	5.8e-20	3.5e-18	[4, 5, 6, 7, 8, 9, 10, 11]	Group42	16.7323
GO:0016023	cytoplasmic, membrane-bounded vesicle	78	[ABCC4, AGTRAP, AP1G1, APP, ATP1B3, ATP6V0A1, ATP6V0A2, ATP6V0D1, ATP7B, BET1, C3orf58, CADM1, CHP1, CLCN3, CXADR, DNAJC5, FAM3C, FNDC3A, GJA1, GOLGA5, GOLIM4, GOSR2, GPR107, GPR89A, HLA-B, IGF2R, ITM2B, KDELR1, LAMP2, LMAN1, LMAN2L, LNPEP, MFSD10, NCSTN, PI4K2A, PICALM, PIGT, PIK3R4, POMT1, RAB29, RAB32, SCAMP1, SCAMP2, SCAMP4, SCAP, SCARB1, SCFD1, SLC1A4, SLC30A5, SLC30A7, SMO, SORT1, SREBF2, S…	GO_CellularComponent-GOA_09.02.2016_16h18	3.1e-06	0.00036	0.0001	0.0041	[4, 5, 6, 7, 8]	Group14	6.51085
GO:0031300	intrinsic component of organelle membrane	71	[ABCB10, AMFR, ANKLE2, APOO, APOOL, ARMCX3, ASPH, AUP1, BNIP1, BSCL2, C19orf70, CHCHD3, COA3, CPT1A, DERL1, DERL2, DHCR7, DOLK, DPAGT1, EMC1, EMC10, EMC2, EMC3, EMC4, EMC6, EMC7, EMC8, ESYT2, G6PC3, GALNT2, GPAA1, HLA-B, ITM2B, LEMD2, LEMD3, MCU, MMGT1, OXA1L, PEX16, PIGG, PIGK, PIGS, PIGT, PIGU, PTPMT1, QSOX2, RCE1, RER1, RHBDD1, RHOT1, RHOT2, RTN2, SACM1L, SGPL1, SLC25A17, SLC37A4, SPCS1, SREBF…	GO_CellularComponent-GOA_09.02.2016_16h18	5.1e-38	8.8e-36	1.5e-46	9.8e-45	[2, 3, 4]	Group7	24.8252
GO:0031301	integral component of organelle membrane	70	[ABCB10, AMFR, ANKLE2, APOO, APOOL, ARMCX3, ASPH, AUP1, BNIP1, BSCL2, C19orf70, CHCHD3, COA3, CPT1A, DERL1, DERL2, DHCR7, DOLK, DPAGT1, EMC1, EMC10, EMC2, EMC3, EMC4, EMC6, EMC7, EMC8, G6PC3, GALNT2, GPAA1, HLA-B, ITM2B, LEMD2, LEMD3, MCU, MMGT1, OXA1L, PEX16, PIGG, PIGK, PIGS, PIGT, PIGU, PTPMT1, QSOX2, RCE1, RER1, RHBDD1, RHOT1, RHOT2, RTN2, SACM1L, SGPL1, SLC25A17, SLC37A4, SPCS1, SREBF2, SYNJ…	GO_CellularComponent-GOA_09.02.2016_16h18	2.2e-38	3.9e-36	1.5e-46	9.8e-45	[3, 4, 5]	Group7	25.5474
GO:0031226	intrinsic component of plasma membrane	67	[ABCC1, ABHD12, ADAM17, APH1A, APP, ATP1B3, ATP2B1, ATP2C1, ATP7B, CADM1, CHRNA5, CLPTM1, CXADR, EBP, EFNB1, ESYT2, FLVCR1, GGT7, GJA1, GOLM1, HEATR6, HLA-B, IGF1R, IGF2R, IRAK1, LMAN2, LNPEP, M6PR, MAGT1, MPZL1, NCSTN, NPC1, PI4K2A, PSEN1, PTK7, RCE1, SACM1L, SCARB1, SIGMAR1, SLC12A2, SLC12A4, SLC12A6, SLC12A7, SLC16A10, SLC19A1, SLC19A2, SLC1A4, SLC29A1, SLC30A5, SLC33A1, SLC38A1, SLC38A2, SLC4…	GO_CellularComponent-GOA_09.02.2016_16h18	0.54	1	0.54	1	[3, 4, 5, 6]	Group5	4.07047
GO:0005887	integral component of plasma membrane	66	[ABCC1, ABHD12, ADAM17, APH1A, APP, ATP1B3, ATP2B1, ATP2C1, ATP7B, CADM1, CHRNA5, CLPTM1, CXADR, EBP, EFNB1, ESYT2, FLVCR1, GJA1, GOLM1, HEATR6, HLA-B, IGF1R, IGF2R, IRAK1, LMAN2, LNPEP, M6PR, MAGT1, MPZL1, NCSTN, NPC1, PI4K2A, PSEN1, PTK7, RCE1, SACM1L, SCARB1, SIGMAR1, SLC12A2, SLC12A4, SLC12A6, SLC12A7, SLC16A10, SLC19A1, SLC19A2, SLC1A4, SLC29A1, SLC30A5, SLC33A1, SLC38A1, SLC38A2, SLC43A1, S…	GO_CellularComponent-GOA_09.02.2016_16h18	0.4	1	0.54	1	[3, 4, 5, 6, 7]	Group5	4.18251
GO:0005773	vacuole	60	[AP1G1, ATG9A, ATP11C, ATP6AP1, ATP6V0A1, ATP6V0A2, ATP6V0D1, ATP6V1F, ATP6V1H, DAGLB, DNAJC5, GJA1, GLA, GOLT1B, IGF2R, ITM2C, LAMP2, LAMTOR1, LNPEP, M6PR, MFSD12, MFSD8, MTCH1, NCSTN, NPC1, PI4K2A, PIK3R4, PSEN1, RAB24, RAB29, RDH14, SCARB1, SCARB2, SLC12A4, SLC38A9, SORT1, SPNS1, STARD3NL, STX17, STX4, STX7, STX8, TM9SF1, TMEM165, TMEM208, TMEM59, TMEM63A, TMEM9, TMEM97, UBQLN1, UBQLN2, UBQLN4…	GO_CellularComponent-GOA_09.02.2016_16h18	4.7e-10	6.7e-08	8.4e-07	4e-05	[4, 5, 6, 7]	Group48	9.09091
GO:0098589	membrane region	55	[ABCC1, ABCC4, ADAM17, APBB1, APP, ATAD1, ATP1B3, ATP2B1, ATP6V0D1, ATP7B, CADM1, CHRNA5, CLCN3, CNNM2, COMT, CXADR, DHRS3, EFNB1, GJA1, GLMN, HMOX1, LAMP2, LAMTOR1, MFSD10, NPC1, PI4K2A, PICALM, PSEN1, SCARB1, SIGMAR1, SLC12A2, SLC12A6, SLC16A10, SLC19A1, SLC1A3, SLC22A18, SLC27A4, SLC29A1, SLC30A5, SLC38A9, SLC4A2, SLC5A6, SLC7A6, SLC9A3R2, SMO, SMPD2, SORT1, SPNS1, STOM, STX12, STX4, STXBP3, T…	GO_CellularComponent-GOA_09.02.2016_16h18	0.18	1	0.17	1	[2, 3]	Group40	4.48248
GO:0005768	endosome	55	[ANKRD13A, AP1G1, APP, ATG9A, ATP11C, ATP6AP1, ATP6V0A1, ATP6V0A2, ATP6V0D1, ATP7B, CLCN3, DERL1, DERL2, GJA1, GOLIM4, GPR107, HLA-B, IGF2R, IRAK1, ITM2B, LAMP2, LAMTOR1, LNPEP, M6PR, MMGT1, NDFIP2, NIPA2, NPC1, PI4K2A, PIK3R4, PRAF2, RAB32, SCAMP1, SCAMP2, SLC38A9, SNX27, SORT1, STARD3NL, STX12, STX4, STX7, STX8, TGFBR1, TM9SF2, TMEM165, TMEM59, TMEM9, TMUB1, TOM1, UNC93B1, VAMP4, VAMP7, VPS4A, …	GO_CellularComponent-GOA_09.02.2016_16h18	4.5e-05	0.0048	8.4e-07	4e-05	[3, 4, 5, 6, 7]	Group48	6.7402
GO:1902494	catalytic complex	47	[ABCB8, AMFR, ATP1B3, AUP1, BCS1L, DAD1, DCUN1D5, FBXL12, GLMN, GPAA1, GPD2, MAGT1, NDUFA11, NDUFA13, NDUFA4, NDUFA5, NDUFA8, NDUFA9, NDUFAF1, NDUFB10, NDUFB4, NDUFS1, NDUFS2, NDUFS3, OS9, PIGK, PIGS, PIGT, PIGU, PIK3R4, POMT1, PRKAG1, SDF2L1, SEL1L, SPCS1, SPCS2, SPCS3, SPTLC1, SPTLC2, STT3B, SYVN1, TAF6L, TGFBR1, UBE4A, UQCC3, UQCR10, WRB]	GO_CellularComponent-GOA_09.02.2016_16h18	0.37	1	5.8e-20	3.5e-18	[3]	Group42	4.28051
GO:0000323	lytic vacuole	46	[AP1G1, ATP11C, ATP6V0A2, ATP6V0D1, ATP6V1H, DAGLB, DNAJC5, GJA1, GLA, GOLT1B, IGF2R, ITM2C, LAMP2, LAMTOR1, LNPEP, M6PR, MFSD12, MFSD8, MTCH1, NCSTN, NPC1, PI4K2A, PSEN1, RDH14, SCARB1, SCARB2, SLC12A4, SLC38A9, SORT1, SPNS1, STARD3NL, STX17, STX7, STX8, TM9SF1, TMEM165, TMEM59, TMEM63A, TMEM9, TMEM97, UNC93B1, USE1, VAMP4, VAMP7, VMA21, VPS4A]	GO_CellularComponent-GOA_09.02.2016_16h18	8.7e-07	0.0001	8.4e-07	4e-05	[5, 6, 7, 8]	Group48	8.21429
GO:0005764	lysosome	46	[AP1G1, ATP11C, ATP6V0A2, ATP6V0D1, ATP6V1H, DAGLB, DNAJC5, GJA1, GLA, GOLT1B, IGF2R, ITM2C, LAMP2, LAMTOR1, LNPEP, M6PR, MFSD12, MFSD8, MTCH1, NCSTN, NPC1, PI4K2A, PSEN1, RDH14, SCARB1, SCARB2, SLC12A4, SLC38A9, SORT1, SPNS1, STARD3NL, STX17, STX7, STX8, TM9SF1, TMEM165, TMEM59, TMEM63A, TMEM9, TMEM97, UNC93B1, USE1, VAMP4, VAMP7, VMA21, VPS4A]	GO_CellularComponent-GOA_09.02.2016_16h18	8.7e-07	0.0001	8.4e-07	4e-05	[6, 7, 8, 9]	Group48	8.21429
GO:0012506	vesicle membrane	44	[ABCC4, AGTRAP, AP1G1, ATP6V0A1, ATP6V0A2, ATP6V0D1, C3orf58, CLCN3, DNAJC5, FNDC3A, GJA1, GOLGA5, GOSR2, GPR89A, HLA-B, ITM2B, KDELR1, LAMP2, LMAN1, LNPEP, MFSD10, PICALM, PIK3R4, RAB32, SCAMP1, SCAP, SCARB1, SLC30A5, SLC5A6, SMO, SREBF2, STX17, STX5, SV2A, SYNGR2, TMED10, TMED2, TMED3, TMED7, VAMP7, VMA21, WLS, ZDHHC13, ZDHHC17]	GO_CellularComponent-GOA_09.02.2016_16h18	9.1e-07	0.00011	1.9e-09	1e-07	[3, 4]	Group31	8.49421
GO:0044455	mitochondrial membrane part	44	[ABCB10, APOO, APOOL, ARMCX3, ATP5I, BCS1L, C19orf70, CHCHD3, COA3, COX15, COX4I1, COX7B, CPT1A, MCU, MON2, NDUFA11, NDUFA13, NDUFA4, NDUFA5, NDUFA8, NDUFA9, NDUFAF1, NDUFB10, NDUFB4, NDUFS1, NDUFS2, NDUFS3, NNT, OXA1L, PAM16, PTPMT1, RHOT1, RHOT2, SAMM50, SYNJ2BP, TIMM17A, TIMM17B, TIMM23, TMEM11, TMEM70, TOMM70A, UQCC3, UQCR10, USMG5]	GO_CellularComponent-GOA_09.02.2016_16h18	4.4e-23	7.2e-21	5.8e-20	3.5e-18	[2, 3, 4, 5, 6, 7, 8, 9, 10, 11]	Group42	23.7838
GO:0044437	vacuolar part	44	[AP1G1, ATG9A, ATP11C, ATP6AP1, ATP6V0A1, ATP6V0A2, ATP6V0D1, ATP6V1F, ATP6V1H, DAGLB, DNAJC5, GLA, IGF2R, ITM2C, LAMP2, LAMTOR1, LNPEP, M6PR, MFSD12, MFSD8, MTCH1, NCSTN, NPC1, PI4K2A, PSEN1, RDH14, SCARB1, SCARB2, SLC12A4, SLC38A9, SORT1, SPNS1, STARD3NL, STX17, STX7, STX8, TM9SF1, TMEM165, TMEM59, TMEM63A, TMEM9, VAMP7, VMP1, VPS4A]	GO_CellularComponent-GOA_09.02.2016_16h18	9.4e-10	1.3e-07	8.4e-07	4e-05	[3, 4, 5, 6, 7, 8]	Group48	10.5516
GO:0044433	cytoplasmic vesicle part	43	[ABCC4, AGTRAP, AP1G1, APP, ATP6V0A1, ATP6V0A2, ATP6V0D1, C3orf58, CLCN3, DNAJC5, GJA1, GOLGA5, GOSR2, GPR89A, HLA-B, ITM2B, KDELR1, LAMP2, LMAN1, LNPEP, MFSD10, PICALM, PIK3R4, RAB32, SCAMP1, SCAP, SCARB1, SLC30A5, SMO, SREBF2, STX17, STX5, SV2A, SYNGR2, TMED10, TMED2, TMED3, TMED7, VAMP7, VMA21, WLS, ZDHHC13, ZDHHC17]	GO_CellularComponent-GOA_09.02.2016_16h18	4.3e-05	0.0045	1.9e-09	1e-07	[3, 4, 5, 6, 7, 8]	Group31	7.2758
GO:0098590	plasma membrane region	43	[ABCC1, ABCC4, ADAM17, APBB1, ATAD1, ATP1B3, ATP2B1, ATP6V0D1, ATP7B, CADM1, CHRNA5, CLCN3, CNNM2, COMT, CXADR, DHRS3, GJA1, GLMN, HMOX1, MFSD10, PI4K2A, PICALM, SCARB1, SIGMAR1, SLC12A2, SLC12A6, SLC16A10, SLC19A1, SLC1A3, SLC22A18, SLC27A4, SLC29A1, SLC30A5, SLC4A2, SLC5A6, SLC7A6, SLC9A3R2, SMO, SMPD2, STX4, STXBP3, TMUB1, WLS]	GO_CellularComponent-GOA_09.02.2016_16h18	0.44	1	0.17	1	[3, 4, 5, 6]	Group40	4.24901
GO:0005774	vacuolar membrane	43	[AP1G1, ATG9A, ATP11C, ATP6AP1, ATP6V0A1, ATP6V0A2, ATP6V0D1, ATP6V1F, ATP6V1H, DAGLB, DNAJC5, IGF2R, ITM2C, LAMP2, LAMTOR1, LNPEP, M6PR, MFSD12, MFSD8, MTCH1, NCSTN, NPC1, PI4K2A, PSEN1, RDH14, SCARB1, SCARB2, SLC12A4, SLC38A9, SORT1, SPNS1, STARD3NL, STX17, STX7, STX8, TM9SF1, TMEM165, TMEM59, TMEM63A, TMEM9, VAMP7, VMP1, VPS4A]	GO_CellularComponent-GOA_09.02.2016_16h18	1.8e-12	2.8e-10	8.4e-07	4e-05	[3, 4, 5, 6, 7, 8, 9]	Group48	12.9518
GO:0005635	nuclear envelope	42	[AAAS, AGPAT3, ALG14, APP, BAX, BNIP1, CEPT1, CERS2, CERS4, CERS5, CERS6, DHCR7, DNAJC1, DPY19L1, EI24, GHDC, IGF2R, IPO13, LEMD2, LEMD3, MAD2L1, NDC1, NDUFB4, NPC1, NRM, PIK3R4, PSEN1, QSOX2, RETSAT, SIGMAR1, SLC22A18, SLC30A1, SORT1, TMEM120B, TMEM201, TMEM43, TMEM57, TMEM97, TNPO3, TSPO, UBXN4, ZMPSTE24]	GO_CellularComponent-GOA_09.02.2016_16h18	2.6e-08	3.7e-06	2.6e-08	1.4e-06	[3, 4, 5, 6, 7, 8, 9]	Group11	9.69977
GO:0031984	organelle subcompartment	42	[AP1G1, APH1A, APP, ASPH, ATG9A, ATP2C1, ATP7B, B4GALT7, BET1, CHPF, CPD, GALNT1, GALNT2, GCC2, GOLGA5, GOLIM4, GOSR1, GPR89A, IGF2R, KIAA1715, LPCAT2, M6PR, RAB29, RAB32, RTN2, SCAMP1, SCAMP2, SCFD1, SMPD4, SORT1, STX4, STX8, TMED2, TMED3, TMEM115, TMEM165, TMEM59, VAMP4, VAMP7, WLS, YIPF5, YIPF6]	GO_CellularComponent-GOA_09.02.2016_16h18	8.4e-13	1.2e-10	1.2e-15	7.5e-14	[3, 4, 5, 6, 7]	Group30	13.5048
GO:0030659	cytoplasmic vesicle membrane	42	[ABCC4, AGTRAP, AP1G1, ATP6V0A1, ATP6V0A2, ATP6V0D1, C3orf58, CLCN3, DNAJC5, GJA1, GOLGA5, GOSR2, GPR89A, HLA-B, ITM2B, KDELR1, LAMP2, LMAN1, LNPEP, MFSD10, PICALM, PIK3R4, RAB32, SCAMP1, SCAP, SCARB1, SLC30A5, SMO, SREBF2, STX17, STX5, SV2A, SYNGR2, TMED10, TMED2, TMED3, TMED7, VAMP7, VMA21, WLS, ZDHHC13, ZDHHC17]	GO_CellularComponent-GOA_09.02.2016_16h18	1.9e-06	0.00023	1.9e-09	1e-07	[4, 5, 6, 7, 8, 9]	Group31	8.4507
GO:0031227	intrinsic component of endoplasmic reticulum membrane	40	[AMFR, ANKLE2, ASPH, AUP1, BNIP1, BSCL2, DERL1, DERL2, DHCR7, DOLK, DPAGT1, EMC1, EMC10, EMC2, EMC3, EMC4, EMC6, EMC7, EMC8, ESYT2, G6PC3, GPAA1, HLA-B, MMGT1, PIGG, PIGK, PIGS, PIGT, PIGU, RCE1, RHBDD1, RTN2, SACM1L, SGPL1, SLC37A4, SPCS1, SREBF2, SYVN1, VIMP, WFS1]	GO_CellularComponent-GOA_09.02.2016_16h18	1.3e-24	2.2e-22	1.5e-46	9.8e-45	[3, 4, 5, 6, 7, 8, 9, 10]	Group7	28.9855
GO:0098791	Golgi subcompartment	39	[AP1G1, APH1A, APP, ATG9A, ATP2C1, ATP7B, B4GALT7, BET1, CHPF, CPD, GALNT1, GALNT2, GCC2, GOLGA5, GOLIM4, GOSR1, GPR89A, IGF2R, LPCAT2, M6PR, RAB29, RAB32, SCAMP1, SCAMP2, SCFD1, SMPD4, SORT1, STX4, STX8, TMED2, TMED3, TMEM115, TMEM165, TMEM59, VAMP4, VAMP7, WLS, YIPF5, YIPF6]	GO_CellularComponent-GOA_09.02.2016_16h18	1e-11	1.6e-09	1.2e-15	7.5e-14	[4, 5, 6, 7, 8, 9]	Group30	13.2203
GO:0030176	integral component of endoplasmic reticulum membrane	39	[AMFR, ANKLE2, ASPH, AUP1, BNIP1, BSCL2, DERL1, DERL2, DHCR7, DOLK, DPAGT1, EMC1, EMC10, EMC2, EMC3, EMC4, EMC6, EMC7, EMC8, G6PC3, GPAA1, HLA-B, MMGT1, PIGG, PIGK, PIGS, PIGT, PIGU, RCE1, RHBDD1, RTN2, SACM1L, SGPL1, SLC37A4, SPCS1, SREBF2, SYVN1, VIMP, WFS1]	GO_CellularComponent-GOA_09.02.2016_16h18	3.2e-24	5.3e-22	1.5e-46	9.8e-45	[3, 4, 5, 6, 7, 8, 9, 10, 11]	Group7	29.3233
GO:0048471	perinuclear region of cytoplasm	38	[ALG2, AMFR, AP1G1, APBB1, APP, ATP7B, BAG5, BAX, GALNT1, GALNT2, HMOX1, IGF2R, ITM2C, LNPEP, M6PR, MAD2L1, NDFIP2, NPC1, OMA1, PICALM, RAB29, RHBDD2, S100A14, SLC25A21, SLC30A7, SNAP47, SORT1, STOM, STX4, STX7, STX8, TOLLIP, TSPO, UBQLN1, UBQLN4, VAMP7, VPS4A, VTI1A]	GO_CellularComponent-GOA_09.02.2016_16h18	0.019	1	0.019	0.55	[4, 5, 6, 7]	Group34	5.52326
GO:0098852	lytic vacuole membrane	37	[AP1G1, ATP11C, ATP6V0A2, ATP6V0D1, ATP6V1H, DAGLB, DNAJC5, IGF2R, ITM2C, LAMP2, LAMTOR1, LNPEP, M6PR, MFSD12, MFSD8, MTCH1, NCSTN, NPC1, PI4K2A, PSEN1, RDH14, SCARB1, SCARB2, SLC12A4, SLC38A9, SORT1, SPNS1, STARD3NL, STX17, STX7, STX8, TM9SF1, TMEM165, TMEM59, TMEM63A, TMEM9, VAMP7]	GO_CellularComponent-GOA_09.02.2016_16h18	7e-11	1e-08	8.4e-07	4e-05	[4, 5, 6, 7, 8, 9, 10]	Group48	12.9371
GO:0005765	lysosomal membrane	37	[AP1G1, ATP11C, ATP6V0A2, ATP6V0D1, ATP6V1H, DAGLB, DNAJC5, IGF2R, ITM2C, LAMP2, LAMTOR1, LNPEP, M6PR, MFSD12, MFSD8, MTCH1, NCSTN, NPC1, PI4K2A, PSEN1, RDH14, SCARB1, SCARB2, SLC12A4, SLC38A9, SORT1, SPNS1, STARD3NL, STX17, STX7, STX8, TM9SF1, TMEM165, TMEM59, TMEM63A, TMEM9, VAMP7]	GO_CellularComponent-GOA_09.02.2016_16h18	7e-11	1e-08	8.4e-07	4e-05	[5, 6, 7, 8, 9, 10, 11]	Group48	12.9371
GO:0030133	transport vesicle	35	[APP, ATP6V0D1, BET1, CADM1, CHP1, CLCN3, DNAJC5, GOSR2, HLA-B, IGF2R, KDELR1, LMAN1, LMAN2L, SCAMP1, SCAMP2, SCAMP4, SCAP, SORT1, SREBF2, STX17, STX4, STX5, SV2A, SYNGR2, TMED10, TMED2, TMED3, TMED7, TMED9, VAMP7, VMA21, VTI1A, YIPF3, YIPF5, YIPF6]	GO_CellularComponent-GOA_09.02.2016_16h18	1.2e-07	1.6e-05	0.00056	0.02	[3, 4, 5, 6, 7, 8, 9]	Group23	10.1744
GO:0044440	endosomal part	35	[APP, ATG9A, ATP6AP1, ATP6V0A1, ATP6V0A2, ATP6V0D1, CLCN3, GOLIM4, HLA-B, IRAK1, ITM2B, LAMP2, LAMTOR1, LNPEP, MMGT1, NDFIP2, NPC1, PRAF2, RAB32, SCAMP1, SCAMP2, SLC38A9, SNX27, SORT1, STARD3NL, STX12, STX7, STX8, TM9SF2, TMEM165, TMEM59, TMEM9, VAMP7, VPS4A, WLS]	GO_CellularComponent-GOA_09.02.2016_16h18	3.4e-05	0.0037	8.4e-07	4e-05	[3, 4, 5, 6, 7, 8]	Group48	8.00915
GO:0010008	endosome membrane	32	[ATG9A, ATP6AP1, ATP6V0A1, ATP6V0A2, ATP6V0D1, CLCN3, GOLIM4, HLA-B, IRAK1, ITM2B, LAMP2, LAMTOR1, MMGT1, NDFIP2, NPC1, PRAF2, SCAMP1, SCAMP2, SLC38A9, SNX27, SORT1, STARD3NL, STX12, STX7, STX8, TM9SF2, TMEM165, TMEM59, TMEM9, VAMP7, VPS4A, WLS]	GO_CellularComponent-GOA_09.02.2016_16h18	9.9e-05	0.01	8.4e-07	4e-05	[3, 4, 5, 6, 7, 8, 9]	Group48	7.90123
GO:0031965	nuclear membrane	31	[AAAS, ALG14, CEPT1, CERS2, CERS4, CERS5, CERS6, DHCR7, DNAJC1, DPY19L1, EI24, IPO13, LEMD2, LEMD3, NDC1, NDUFB4, NRM, PSEN1, QSOX2, RETSAT, SIGMAR1, SLC30A1, SORT1, TMEM120B, TMEM201, TMEM43, TMEM57, TMEM97, TNPO3, TSPO, ZMPSTE24]	GO_CellularComponent-GOA_09.02.2016_16h18	4e-07	5.1e-05	2.6e-08	1.4e-06	[3, 4, 5, 6, 7, 8, 9, 10]	Group11	10.4027
GO:0031968	organelle outer membrane	31	[ACSL1, AGK, ARMCX3, BAX, BRI3BP, CISD1, CISD2, CPT1A, CYB5B, DHCR7, GJA1, HK2, LETMD1, MAVS, MCL1, MFN1, MTX1, NLRX1, PSEN1, RAB32, RAF1, RETSAT, RHOT1, RHOT2, RNF185, SAMM50, SIGMAR1, SLC25A46, SYNJ2BP, TOMM70A, TSPO]	GO_CellularComponent-GOA_09.02.2016_16h18	3.2e-11	4.7e-09	3.2e-11	1.8e-09	[3, 4, 5, 6, 7, 8]	Group12	15.3465
GO:0098798	mitochondrial protein complex	31	[APOO, APOOL, ATP5I, BAX, BCS1L, C19orf70, CHCHD3, COX4I1, MCU, MON2, NDUFA11, NDUFA13, NDUFA4, NDUFA5, NDUFA8, NDUFA9, NDUFAF1, NDUFB10, NDUFB4, NDUFS1, NDUFS2, NDUFS3, PAM16, SAMM50, TIMM17A, TIMM17B, TIMM23, TOMM70A, UQCC3, UQCR10, USMG5]	GO_CellularComponent-GOA_09.02.2016_16h18	3e-15	4.8e-13	5.8e-20	3.5e-18	[3, 4, 5, 6, 7, 8, 9]	Group42	21.3793
GO:0030135	coated vesicle	28	[AP1G1, APP, C3orf58, DNAJC5, GOLGA5, GOSR2, GPR107, HLA-B, IGF2R, KDELR1, LMAN1, LMAN2L, PICALM, SCAMP1, SCAP, SORT1, SREBF2, STX17, STX5, TMED10, TMED2, TMED3, TMED7, TMED9, VMA21, VTI1A, YIPF5, YIPF6]	GO_CellularComponent-GOA_09.02.2016_16h18	2.1e-07	2.7e-05	1.9e-09	1e-07	[5, 6, 7, 8, 9]	Group31	11.4286
GO:0098800	inner mitochondrial membrane protein complex	28	[APOO, APOOL, ATP5I, BCS1L, C19orf70, CHCHD3, COX4I1, MCU, MON2, NDUFA11, NDUFA13, NDUFA4, NDUFA5, NDUFA8, NDUFA9, NDUFAF1, NDUFB10, NDUFB4, NDUFS1, NDUFS2, NDUFS3, PAM16, TIMM17A, TIMM17B, TIMM23, UQCC3, UQCR10, USMG5]	GO_CellularComponent-GOA_09.02.2016_16h18	1.2e-15	1.9e-13	5.8e-20	3.5e-18	[3, 4, 5, 6, 7, 8, 9, 10, 11, 12]	Group42	24.7788
GO:0005741	mitochondrial outer membrane	27	[ACSL1, AGK, ARMCX3, BAX, BRI3BP, CISD1, CISD2, CPT1A, CYB5B, GJA1, HK2, LETMD1, MAVS, MCL1, MFN1, MTX1, NLRX1, RAB32, RAF1, RHOT1, RHOT2, RNF185, SAMM50, SLC25A46, SYNJ2BP, TOMM70A, TSPO]	GO_CellularComponent-GOA_09.02.2016_16h18	9e-10	1.2e-07	3.2e-11	1.8e-09	[4, 5, 6, 7, 8, 9, 10, 11]	Group12	15.0838
GO:0005793	endoplasmic reticulum-Golgi intermediate compartment	24	[BET1, CHP1, ERGIC1, ERGIC2, ERGIC3, ERP44, GOSR2, KDELR1, LMAN1, LMAN2, MAN1A1, RER1, STX17, STX5, TMED10, TMED2, TMED3, TMED5, TMED7, TMED9, UGGT1, VMA21, VMP1, YIF1A]	GO_CellularComponent-GOA_09.02.2016_16h18	9e-13	1.3e-10	1.9e-09	1e-07	[4, 5, 6, 7]	Group31	22.8571
GO:0099503	secretory vesicle	23	[ABCC4, APP, ATP6V0A2, ATP6V0D1, CADM1, CLCN3, CXADR, DNAJC5, FNDC3A, LAMP2, POMT1, SCAMP1, SLC30A5, STX4, STX7, STXBP3, SV2A, SYNGR2, TMED10, TMED2, VAMP7, VEZT, VTI1A]	GO_CellularComponent-GOA_09.02.2016_16h18	0.22	1	0.00056	0.02	[5, 6, 7, 8, 9]	Group23	4.84211
GO:0070469	respiratory chain	23	[BCS1L, COX15, COX4I1, COX7B, CYC1, HIGD1A, NDUFA11, NDUFA13, NDUFA4, NDUFA5, NDUFA8, NDUFA9, NDUFAF1, NDUFB10, NDUFB4, NDUFS1, NDUFS2, NDUFS3, NNT, OXA1L, UQCC3, UQCR10, UQCRQ]	GO_CellularComponent-GOA_09.02.2016_16h18	2.1e-13	3.2e-11	3.5e-13	2e-11	[2, 3]	Group37	25.5556
GO:0005770	late endosome	23	[ANKRD13A, ATG9A, ATP7B, CLCN3, DERL1, DERL2, GJA1, IGF2R, LAMP2, LAMTOR1, M6PR, NDFIP2, NPC1, PIK3R4, SLC38A9, STARD3NL, STX7, STX8, TMEM165, TMEM59, TMEM9, VAMP7, VPS4A]	GO_CellularComponent-GOA_09.02.2016_16h18	2.5e-06	0.00029	8.4e-07	4e-05	[4, 5, 6, 7, 8]	Group48	11.4428
GO:0098857	membrane microdomain	21	[ADAM17, APP, ATP1B3, ATP2B1, CXADR, EFNB1, GJA1, HMOX1, LAMP2, LAMTOR1, NPC1, PI4K2A, PSEN1, SCARB1, SLC38A9, SMO, SMPD2, SPNS1, STOM, STX12, TGFBR1]	GO_CellularComponent-GOA_09.02.2016_16h18	0.017	1	0.17	1	[3, 4]	Group40	6.52174
GO:0005802	trans-Golgi network	21	[AP1G1, APP, ATG9A, ATP2C1, ATP7B, CPD, GCC2, IGF2R, M6PR, RAB29, RAB32, SCAMP1, SCAMP2, SMPD4, STX4, STX8, TMEM165, VAMP4, VAMP7, WLS, YIPF6]	GO_CellularComponent-GOA_09.02.2016_16h18	8.4e-06	0.00094	7.4e-23	4.5e-21	[4, 5, 6, 7, 8, 9, 10]	Group41	11.2903
GO:0030425	dendrite	20	[ACAD9, AMFR, APBB1, APP, CADM1, CHRNA5, COMT, ILK, PI4K2A, PLCB4, PSEN1, SLC1A3, SLC1A4, SLC38A2, SNAP47, SORT1, STX4, UBXN1, WFS1, WLS]	GO_CellularComponent-GOA_09.02.2016_16h18	0.72	1	0.00056	0.02	[4, 5]	Group23	4.03226
GO:0005746	mitochondrial respiratory chain	20	[BCS1L, COX15, COX4I1, COX7B, NDUFA11, NDUFA13, NDUFA4, NDUFA5, NDUFA8, NDUFA9, NDUFAF1, NDUFB10, NDUFB4, NDUFS1, NDUFS2, NDUFS3, NNT, OXA1L, UQCC3, UQCR10]	GO_CellularComponent-GOA_09.02.2016_16h18	3.3e-12	4.9e-10	3.5e-13	2e-11	[3, 4, 5, 6, 7, 8, 9, 10, 11, 12]	Group37	26.6667
GO:0045121	membrane raft	20	[ADAM17, APP, ATP1B3, ATP2B1, CXADR, EFNB1, GJA1, HMOX1, LAMTOR1, NPC1, PI4K2A, PSEN1, SCARB1, SLC38A9, SMO, SMPD2, SPNS1, STOM, STX12, TGFBR1]	GO_CellularComponent-GOA_09.02.2016_16h18	0.026	1	0.17	1	[4, 5]	Group40	6.23053
GO:0098573	intrinsic component of mitochondrial membrane	20	[ABCB10, APOO, APOOL, ARMCX3, C19orf70, CHCHD3, COA3, CPT1A, MCU, OXA1L, PTPMT1, RHOT1, RHOT2, SYNJ2BP, TIMM17A, TIMM17B, TIMM23, TMEM11, TMEM70, UQCC3]	GO_CellularComponent-GOA_09.02.2016_16h18	4.3e-15	6.6e-13	5.8e-20	3.5e-18	[3, 4, 5, 6, 7, 8, 9, 10, 11, 12]	Group42	36.3636
GO:0032592	integral component of mitochondrial membrane	20	[ABCB10, APOO, APOOL, ARMCX3, C19orf70, CHCHD3, COA3, CPT1A, MCU, OXA1L, PTPMT1, RHOT1, RHOT2, SYNJ2BP, TIMM17A, TIMM17B, TIMM23, TMEM11, TMEM70, UQCC3]	GO_CellularComponent-GOA_09.02.2016_16h18	2.8e-15	4.4e-13	5.8e-20	3.5e-18	[4, 5, 6, 7, 8, 9, 10, 11, 12, 13]	Group42	37.037
GO:0005759	mitochondrial matrix	20	[AASS, ALDH1B1, CHPF, EARS2, FASTKD5, GCDH, IDH2, MCL1, NDUFA9, NDUFS1, NDUFS2, NDUFS3, PAM16, PDK3, PYCR1, RARS2, SCO2, SOAT1, SUCLG1, TFB2M]	GO_CellularComponent-GOA_09.02.2016_16h18	0.37	1	0.37	1	[4, 5, 6, 7, 8, 9]	Group47	4.60829
GO:0005769	early endosome	20	[ATP6V0D1, CLCN3, DERL1, DERL2, GJA1, GPR107, HLA-B, IGF2R, LNPEP, MMGT1, NIPA2, RAB32, SNX27, SORT1, STX7, STX8, TMEM165, TOM1, VPS4A, WLS]	GO_CellularComponent-GOA_09.02.2016_16h18	0.022	1	8.4e-07	4e-05	[4, 5, 6, 7, 8]	Group48	6.45161
GO:0030139	endocytic vesicle	19	[AP1G1, ATP6V0A1, ATP6V0A2, ATP6V0D1, CLCN3, GOLIM4, HLA-B, IGF2R, LAMP2, PICALM, PIK3R4, RAB32, SCARB1, SMO, STX12, STX7, UNC93B1, VAMP7, WLS]	GO_CellularComponent-GOA_09.02.2016_16h18	0.0093	0.73	0.00041	0.015	[5, 6, 7, 8, 9]	Group16	7.03704
GO:0033116	endoplasmic reticulum-Golgi intermediate compartment membrane	18	[BET1, ERGIC1, ERGIC2, ERGIC3, GOSR2, KDELR1, LMAN1, LMAN2, STX17, STX5, TMED10, TMED2, TMED3, TMED5, TMED7, TMED9, VMA21, VMP1]	GO_CellularComponent-GOA_09.02.2016_16h18	6.1e-12	9.1e-10	1.9e-09	1e-07	[4, 5, 6, 7, 8]	Group31	29.5082
GO:0030662	coated vesicle membrane	18	[AP1G1, C3orf58, DNAJC5, GOLGA5, GOSR2, HLA-B, KDELR1, LMAN1, PICALM, SCAP, SREBF2, STX17, STX5, TMED10, TMED2, TMED3, TMED7, VMA21]	GO_CellularComponent-GOA_09.02.2016_16h18	8.1e-06	0.00092	1.9e-09	1e-07	[3, 4, 5, 6, 7, 8, 9, 10]	Group31	12.5874
GO:0045177	apical part of cell	18	[ADAM17, APP, ATP2B1, ATP6V0D1, CLCN3, GJA1, GLMN, OMA1, REEP6, SLC12A2, SLC19A1, SLC22A18, SLC29A1, SLC30A5, SLC4A2, SLC9A3R2, STXBP3, VAMP7]	GO_CellularComponent-GOA_09.02.2016_16h18	0.41	1	0.17	1	[2, 3]	Group40	4.60358
GO:0005795	Golgi stack	18	[APH1A, B4GALT7, BET1, CHPF, GALNT1, GALNT2, GOLGA5, GOLIM4, GOSR1, GPR89A, LPCAT2, SCFD1, SORT1, TMED2, TMED3, TMEM115, TMEM59, YIPF5]	GO_CellularComponent-GOA_09.02.2016_16h18	2e-06	0.00025	7.4e-23	4.5e-21	[4, 5, 6, 7, 8, 9, 10]	Group41	13.8462
GO:0030141	secretory granule	17	[ABCC4, APP, ATP6V0A2, CLCN3, CXADR, FNDC3A, LAMP2, POMT1, SCAMP1, SLC30A5, STX4, STX7, STXBP3, TMED10, TMED2, VAMP7, VEZT]	GO_CellularComponent-GOA_09.02.2016_16h18	0.32	1	0.00056	0.02	[3, 4, 6, 7, 8, 9, 10]	Group23	4.7486
GO:0098803	respiratory chain complex	17	[BCS1L, COX4I1, COX7B, NDUFA11, NDUFA13, NDUFA4, NDUFA5, NDUFA8, NDUFA9, NDUFAF1, NDUFB10, NDUFB4, NDUFS1, NDUFS2, NDUFS3, UQCC3, UQCR10]	GO_CellularComponent-GOA_09.02.2016_16h18	3.3e-10	4.7e-08	3.5e-13	2e-11	[3, 4]	Group37	25.3731
GO:0016323	basolateral plasma membrane	17	[ABCC1, ABCC4, ATP2B1, ATP7B, CADM1, CNNM2, CXADR, SLC12A2, SLC12A6, SLC16A10, SLC19A1, SLC1A3, SLC29A1, SLC4A2, SLC7A6, STX4, STXBP3]	GO_CellularComponent-GOA_09.02.2016_16h18	0.0077	0.62	0.17	1	[3, 4, 5, 6, 7]	Group40	7.45614
GO:0031985	Golgi cisterna	17	[APH1A, B4GALT7, BET1, CHPF, GALNT1, GALNT2, GOLGA5, GOLIM4, GOSR1, GPR89A, SCFD1, SORT1, TMED2, TMED3, TMEM115, TMEM59, YIPF5]	GO_CellularComponent-GOA_09.02.2016_16h18	1.1e-07	1.4e-05	7.4e-23	4.5e-21	[5, 6, 7, 8, 9, 10, 11]	Group41	17.7083
GO:0098793	presynapse	16	[APBB1, APP, ATP6V0D1, CADM1, CLCN3, DNAJC5, ILK, PI4K2A, PICALM, PSEN1, SCAMP1, SNAP47, STX4, SV2A, SYNGR2, VTI1A]	GO_CellularComponent-GOA_09.02.2016_16h18	0.11	1	0.00056	0.02	[2, 3, 4]	Group23	5.7554
GO:0005798	Golgi-associated vesicle	16	[C3orf58, GJA1, GOLGA5, GPR89A, IGF2R, ITM2B, KDELR1, SCFD1, SORT1, TMED10, TMED2, TMED3, TMED7, TMED9, ZDHHC13, ZDHHC17]	GO_CellularComponent-GOA_09.02.2016_16h18	1e-07	1.4e-05	1.9e-09	1e-07	[4, 5, 6, 7, 8, 9]	Group31	18.8235
GO:0030658	transport vesicle membrane	16	[CLCN3, GOSR2, HLA-B, LMAN1, SCAMP1, SCAP, SREBF2, STX17, STX5, SV2A, SYNGR2, TMED10, TMED2, TMED7, VAMP7, VMA21]	GO_CellularComponent-GOA_09.02.2016_16h18	0.00017	0.017	1.9e-09	1e-07	[3, 4, 5, 6, 7, 8, 9, 10]	Group31	10.7383
GO:1990204	oxidoreductase complex	16	[BCS1L, GPD2, NDUFA11, NDUFA13, NDUFA4, NDUFA5, NDUFA8, NDUFA9, NDUFAF1, NDUFB10, NDUFB4, NDUFS1, NDUFS2, NDUFS3, UQCC3, UQCR10]	GO_CellularComponent-GOA_09.02.2016_16h18	9.4e-07	0.00011	5.8e-20	3.5e-18	[2, 3, 4]	Group42	16.1616
GO:0030134	ER to Golgi transport vesicle	15	[APP, GOSR2, HLA-B, LMAN1, LMAN2L, SCAP, SREBF2, STX17, STX5, TMED10, TMED2, TMED7, VMA21, YIPF5, YIPF6]	GO_CellularComponent-GOA_09.02.2016_16h18	4.3e-08	5.9e-06	1.9e-09	1e-07	[4, 5, 6, 7, 8, 9, 10]	Group31	21.4286
GO:0031201	SNARE complex	14	[BNIP1, GOSR1, SCFD1, SNAP47, STX12, STX17, STX18, STX4, STX5, STX7, STX8, VAMP4, VAMP7, VTI1A]	GO_CellularComponent-GOA_09.02.2016_16h18	2.2e-09	3.1e-07	2.2e-09	1.2e-07	[3, 4, 5, 6, 7]	Group3	28.5714
GO:0031902	late endosome membrane	14	[ATG9A, CLCN3, LAMP2, LAMTOR1, NDFIP2, NPC1, SLC38A9, STARD3NL, STX8, TMEM165, TMEM59, TMEM9, VAMP7, VPS4A]	GO_CellularComponent-GOA_09.02.2016_16h18	4.7e-05	0.0049	8.4e-07	4e-05	[4, 5, 6, 7, 8, 9, 10]	Group48	13.2075
GO:0030666	endocytic vesicle membrane	13	[AP1G1, ATP6V0A1, ATP6V0A2, ATP6V0D1, HLA-B, LAMP2, PICALM, PIK3R4, RAB32, SCARB1, SMO, VAMP7, WLS]	GO_CellularComponent-GOA_09.02.2016_16h18	0.0094	0.72	0.00041	0.015	[3, 4, 5, 6, 7, 8, 9, 10]	Group16	8.22785
GO:0016324	apical plasma membrane	13	[ADAM17, ATP2B1, ATP6V0D1, CLCN3, GJA1, SLC12A2, SLC19A1, SLC22A18, SLC29A1, SLC30A5, SLC4A2, SLC9A3R2, STXBP3]	GO_CellularComponent-GOA_09.02.2016_16h18	0.65	1	0.17	1	[3, 4, 5, 6, 7]	Group40	4.19355
GO:0032580	Golgi cisterna membrane	13	[APH1A, B4GALT7, CHPF, GALNT1, GALNT2, GOLIM4, GPR89A, SCFD1, SORT1, TMED2, TMED3, TMEM115, YIPF5]	GO_CellularComponent-GOA_09.02.2016_16h18	4.4e-06	0.00051	7.4e-23	4.5e-21	[5, 6, 7, 8, 9, 10, 11, 12]	Group41	17.3333
GO:0000502	proteasome complex	13	[AMFR, AUP1, DNAJB2, GET4, OS9, SEL1L, SYVN1, UBE3C, UBL4A, UBQLN1, UBQLN4, UBXN1, WFS1]	GO_CellularComponent-GOA_09.02.2016_16h18	5.1e-06	0.00058	4.8e-08	2.4e-06	[3, 4, 5]	Group61	17.1053
GO:0030964	NADH dehydrogenase complex	12	[NDUFA11, NDUFA13, NDUFA4, NDUFA5, NDUFA8, NDUFA9, NDUFAF1, NDUFB10, NDUFB4, NDUFS1, NDUFS2, NDUFS3]	GO_CellularComponent-GOA_09.02.2016_16h18	4.2e-08	5.7e-06	5.8e-20	3.5e-18	[3, 4, 5]	Group42	27.907
GO:0045271	respiratory chain complex I	12	[NDUFA11, NDUFA13, NDUFA4, NDUFA5, NDUFA8, NDUFA9, NDUFAF1, NDUFB10, NDUFB4, NDUFS1, NDUFS2, NDUFS3]	GO_CellularComponent-GOA_09.02.2016_16h18	4.2e-08	5.7e-06	5.8e-20	3.5e-18	[3, 4, 5, 6]	Group42	27.907
GO:0005747	mitochondrial respiratory chain complex I	12	[NDUFA11, NDUFA13, NDUFA4, NDUFA5, NDUFA8, NDUFA9, NDUFAF1, NDUFB10, NDUFB4, NDUFS1, NDUFS2, NDUFS3]	GO_CellularComponent-GOA_09.02.2016_16h18	4.2e-08	5.7e-06	5.8e-20	3.5e-18	[4, 5, 6, 7, 8, 9, 10, 11, 12, 13]	Group42	27.907
GO:0031304	intrinsic component of mitochondrial inner membrane	12	[APOO, APOOL, C19orf70, CHCHD3, COA3, MCU, PTPMT1, TIMM17A, TIMM17B, TIMM23, TMEM11, UQCC3]	GO_CellularComponent-GOA_09.02.2016_16h18	4.8e-11	7e-09	5.8e-20	3.5e-18	[4, 5, 6, 7, 8, 9, 10, 11, 12, 13]	Group42	46.1538
GO:0031305	integral component of mitochondrial inner membrane	12	[APOO, APOOL, C19orf70, CHCHD3, COA3, MCU, PTPMT1, TIMM17A, TIMM17B, TIMM23, TMEM11, UQCC3]	GO_CellularComponent-GOA_09.02.2016_16h18	4.8e-11	7e-09	5.8e-20	3.5e-18	[5, 6, 7, 8, 9, 10, 11, 12, 13, 14]	Group42	46.1538
GO:0045335	phagocytic vesicle	11	[ATP6V0A1, ATP6V0A2, ATP6V0D1, CLCN3, HLA-B, LAMP2, PIK3R4, RAB32, STX12, UNC93B1, VAMP7]	GO_CellularComponent-GOA_09.02.2016_16h18	0.00044	0.041	0.00041	0.015	[6, 7, 8, 9, 10]	Group16	12.6437
GO:0030660	Golgi-associated vesicle membrane	11	[C3orf58, GJA1, GOLGA5, GPR89A, ITM2B, KDELR1, TMED2, TMED3, TMED7, ZDHHC13, ZDHHC17]	GO_CellularComponent-GOA_09.02.2016_16h18	2.6e-06	0.0003	1.9e-09	1e-07	[3, 5, 6, 7, 8, 9, 10]	Group31	21.5686
GO:0012507	ER to Golgi transport vesicle membrane	11	[GOSR2, HLA-B, LMAN1, SCAP, SREBF2, STX17, STX5, TMED10, TMED2, TMED7, VMA21]	GO_CellularComponent-GOA_09.02.2016_16h18	4.7e-06	0.00054	1.9e-09	1e-07	[4, 5, 6, 7, 8, 9, 10, 11]	Group31	20.3704
GO:0005801	cis-Golgi network	11	[B3GAT3, BET1, GOLGA5, GOLIM4, GOSR1, KDELR1, KDELR2, SCFD1, TMED10, TMED5, YIPF6]	GO_CellularComponent-GOA_09.02.2016_16h18	8.6e-07	0.00011	8.6e-07	4e-05	[4, 5, 6, 7]	Group55	23.913
GO:0030136	clathrin-coated vesicle	10	[AP1G1, DNAJC5, GPR107, IGF2R, PICALM, SCAMP1, SORT1, TMED10, TMED9, VTI1A]	GO_CellularComponent-GOA_09.02.2016_16h18	0.14	1	1.9e-09	1e-07	[6, 7, 8, 9, 10]	Group31	6.0241
GO:0042579	microbody	10	[ACOT8, ACSL1, ATAD1, FAR1, HMGCR, IDH2, MAVS, PEX16, PXMP2, SLC25A17]	GO_CellularComponent-GOA_09.02.2016_16h18	0.071	1	0.071	1	[4, 5, 6, 7]	Group32	6.99301
GO:0005777	peroxisome	10	[ACOT8, ACSL1, ATAD1, FAR1, HMGCR, IDH2, MAVS, PEX16, PXMP2, SLC25A17]	GO_CellularComponent-GOA_09.02.2016_16h18	0.071	1	0.071	1	[5, 6, 7, 8]	Group32	6.99301
GO:0005776	autophagosome	10	[ATG9A, PIK3R4, RAB24, STX17, TM9SF1, UBQLN1, UBQLN2, UBQLN4, VMP1, VTI1A]	GO_CellularComponent-GOA_09.02.2016_16h18	0.00096	0.086	0.0011	0.04	[5, 6, 7, 8]	Group51	12.3457
GO:0005637	nuclear inner membrane	9	[DPY19L1, LEMD2, LEMD3, NRM, SIGMAR1, TMEM120B, TMEM201, TMEM43, ZMPSTE24]	GO_CellularComponent-GOA_09.02.2016_16h18	0.0002	0.019	2.6e-08	1.4e-06	[4, 5, 6, 7, 8, 9, 10, 11]	Group11	16.3636
GO:0016469	proton-transporting two-sector ATPase complex	9	[ATP5I, ATP6AP1, ATP6V0A1, ATP6V0A2, ATP6V0D1, ATP6V1F, ATP6V1H, MON2, USMG5]	GO_CellularComponent-GOA_09.02.2016_16h18	9.6e-05	0.0098	0.00041	0.015	[3, 4]	Group16	18
GO:0044306	neuron projection terminus	9	[APP, ATP6V0D1, CLCN3, DNAJC5, GOLT1B, ILK, SV2A, TMEM57, VTI1A]	GO_CellularComponent-GOA_09.02.2016_16h18	0.18	1	0.00056	0.02	[3, 4, 5]	Group23	6.04027
GO:0033267	axon part	9	[APBB1, APP, ATP6V0D1, CADM1, CLCN3, DNAJC5, GOLT1B, ILK, SV2A]	GO_CellularComponent-GOA_09.02.2016_16h18	0.72	1	0.00056	0.02	[3, 4, 5, 6]	Group23	4.0724
GO:0008021	synaptic vesicle	9	[ATP6V0D1, CADM1, CLCN3, DNAJC5, SCAMP1, STX4, SV2A, SYNGR2, VTI1A]	GO_CellularComponent-GOA_09.02.2016_16h18	0.11	1	0.00056	0.02	[2, 3, 4, 5, 6, 7, 8, 9, 10, 11]	Group23	6.52174
GO:0070382	exocytic vesicle	9	[ATP6V0D1, CADM1, CLCN3, DNAJC5, SCAMP1, STX4, SV2A, SYNGR2, VTI1A]	GO_CellularComponent-GOA_09.02.2016_16h18	0.18	1	0.00056	0.02	[4, 5, 6, 7, 8, 9, 10]	Group23	6.04027
GO:0044438	microbody part	9	[ACOT8, ACSL1, ATAD1, FAR1, HMGCR, MAVS, PEX16, PXMP2, SLC25A17]	GO_CellularComponent-GOA_09.02.2016_16h18	0.0082	0.64	0.071	1	[3, 4, 5, 6, 7, 8]	Group32	9.78261
GO:0044439	peroxisomal part	9	[ACOT8, ACSL1, ATAD1, FAR1, HMGCR, MAVS, PEX16, PXMP2, SLC25A17]	GO_CellularComponent-GOA_09.02.2016_16h18	0.0082	0.64	0.071	1	[4, 5, 6, 7, 8, 9]	Group32	9.78261
GO:0048770	pigment granule	9	[ATP1B3, ATP6V0A1, DNAJC5, NCSTN, RAB29, RAB32, SLC1A4, STOM, TMED10]	GO_CellularComponent-GOA_09.02.2016_16h18	0.022	1	0.022	0.64	[5, 6, 7, 8, 9]	Group35	8.25688
GO:0042470	melanosome	9	[ATP1B3, ATP6V0A1, DNAJC5, NCSTN, RAB29, RAB32, SLC1A4, STOM, TMED10]	GO_CellularComponent-GOA_09.02.2016_16h18	0.022	1	0.022	0.64	[6, 7, 8, 9, 10]	Group35	8.25688
GO:0072546	ER membrane protein complex	9	[EMC1, EMC10, EMC2, EMC3, EMC4, EMC6, EMC7, EMC8, MMGT1]	GO_CellularComponent-GOA_09.02.2016_16h18	1.5e-12	2.2e-10	1.5e-12	8.7e-11	[3, 4, 5, 6, 7, 8, 9, 10, 11, 12]	Group39	90
GO:0005788	endoplasmic reticulum lumen	9	[ASPH, CLN6, ERLEC1, ERP44, GPX8, OS9, SDF2L1, TMEM43, UGGT1]	GO_CellularComponent-GOA_09.02.2016_16h18	0.71	1	0.71	1	[4, 5, 6, 7, 8, 9]	Group52	4.24528
GO:0030670	phagocytic vesicle membrane	8	[ATP6V0A1, ATP6V0A2, ATP6V0D1, HLA-B, LAMP2, PIK3R4, RAB32, VAMP7]	GO_CellularComponent-GOA_09.02.2016_16h18	0.0013	0.11	0.00041	0.015	[4, 5, 6, 7, 8, 9, 10, 11]	Group16	14.0351
GO:0031903	microbody membrane	8	[ACSL1, ATAD1, FAR1, HMGCR, MAVS, PEX16, PXMP2, SLC25A17]	GO_CellularComponent-GOA_09.02.2016_16h18	0.0018	0.15	0.071	1	[3, 4, 5, 6, 7, 8, 9]	Group32	13.3333
GO:0005778	peroxisomal membrane	8	[ACSL1, ATAD1, FAR1, HMGCR, MAVS, PEX16, PXMP2, SLC25A17]	GO_CellularComponent-GOA_09.02.2016_16h18	0.0018	0.15	0.071	1	[4, 5, 6, 7, 8, 9, 10]	Group32	13.3333
GO:0055037	recycling endosome	8	[AP1G1, ATG9A, ATP11C, SCAMP1, SCAMP2, STX7, STX8, TMUB1]	GO_CellularComponent-GOA_09.02.2016_16h18	0.25	1	0.25	1	[4, 5, 6, 7, 8]	Group36	5.83942
GO:0043679	axon terminus	7	[APP, ATP6V0D1, CLCN3, DNAJC5, GOLT1B, ILK, SV2A]	GO_CellularComponent-GOA_09.02.2016_16h18	0.35	1	0.00056	0.02	[4, 5, 6, 7]	Group23	5.22388
GO:0030667	secretory granule membrane	7	[ABCC4, LAMP2, SCAMP1, SLC30A5, TMED10, TMED2, VAMP7]	GO_CellularComponent-GOA_09.02.2016_16h18	0.023	1	0.00056	0.02	[3, 4, 5, 6, 7, 8, 9, 10, 11]	Group23	9.33333
GO:0005791	rough endoplasmic reticulum	7	[APP, ARL6IP1, CDKAL1, PSEN1, SEC62, STX17, TMEM97]	GO_CellularComponent-GOA_09.02.2016_16h18	0.023	1	0.14	1	[4, 5, 6, 7, 8]	Group24	9.33333
GO:0030427	site of polarized growth	7	[AMFR, APBB1, APP, CXADR, PI4K2A, PSEN1, SIGMAR1]	GO_CellularComponent-GOA_09.02.2016_16h18	0.68	1	1	1	[2, 3]	Group28	4.24242
GO:0030117	membrane coat	7	[AP1G1, C3orf58, IGF2R, PICALM, TMED3, TMED7, VMA21]	GO_CellularComponent-GOA_09.02.2016_16h18	0.09	1	1.9e-09	1e-07	[3, 4, 5, 6, 7]	Group31	7.52688
GO:0030137	COPI-coated vesicle	7	[C3orf58, GOLGA5, KDELR1, TMED10, TMED2, TMED3, TMED7]	GO_CellularComponent-GOA_09.02.2016_16h18	2.1e-05	0.0024	1.9e-09	1e-07	[5, 6, 7, 8, 9, 10]	Group31	29.1667
GO:0070069	cytochrome complex	7	[BCS1L, COX15, COX4I1, COX7B, NDUFA4, UQCC3, UQCR10]	GO_CellularComponent-GOA_09.02.2016_16h18	2.9e-05	0.0031	3.5e-13	2e-11	[3]	Group37	28
GO:0098862	cluster of actin-based cell projections	7	[MFSD10, OMA1, SLC19A1, SLC27A4, SLC38A2, SLC5A6, VEZT]	GO_CellularComponent-GOA_09.02.2016_16h18	0.67	1	0.67	1	[2, 3]	Group45	4.40252
GO:0031901	early endosome membrane	7	[CLCN3, HLA-B, MMGT1, SNX27, STX7, TMEM165, WLS]	GO_CellularComponent-GOA_09.02.2016_16h18	0.21	1	4.5e-05	0.0019	[4, 5, 6, 7, 8, 9, 10]	Group49	5.98291
GO:0005811	lipid particle	7	[HSD17B11, IRAK1, LMBR1, LPCAT1, LPCAT2, NSDHL, SIGMAR1]	GO_CellularComponent-GOA_09.02.2016_16h18	0.013	0.98	0.013	0.41	[4, 5, 6, 7]	Group56	10.4478
GO:0016234	inclusion body	7	[BAG5, DNAJB2, HERPUD1, PICALM, PSEN1, SEC62, UBQLN1]	GO_CellularComponent-GOA_09.02.2016_16h18	0.036	1	0.036	0.93	[3, 4, 5]	Group60	8.53659
GO:0036513	Derlin-1 retrotranslocation complex	7	[AMFR, DERL1, RNF185, RNF5, SEL1L, SYVN1, VIMP]	GO_CellularComponent-GOA_09.02.2016_16h18	3.1e-08	4.3e-06	4.8e-08	2.4e-06	[3, 4, 5, 6, 7, 8, 9, 10]	Group61	63.6364
GO:0033176	proton-transporting V-type ATPase complex	6	[ATP6AP1, ATP6V0A1, ATP6V0A2, ATP6V0D1, ATP6V1F, ATP6V1H]	GO_CellularComponent-GOA_09.02.2016_16h18	0.00021	0.02	0.00041	0.015	[4, 5]	Group16	25
GO:0030663	COPI-coated vesicle membrane	6	[C3orf58, GOLGA5, KDELR1, TMED2, TMED3, TMED7]	GO_CellularComponent-GOA_09.02.2016_16h18	3.6e-05	0.0039	1.9e-09	1e-07	[4, 5, 6, 7, 8, 9, 10, 11]	Group31	33.3333
GO:0005903	brush border	6	[MFSD10, OMA1, SLC19A1, SLC27A4, SLC38A2, SLC5A6]	GO_CellularComponent-GOA_09.02.2016_16h18	0.45	1	0.67	1	[3, 4]	Group45	5.26316
GO:0031970	organelle envelope lumen	5	[APP, IGF2R, NDUFA8, NDUFS1, TIMM23]	GO_CellularComponent-GOA_09.02.2016_16h18	0.4	1	0.4	1	[2, 3, 4, 5, 6, 7, 8]	Group13	5.43478
GO:0032588	trans-Golgi network membrane	5	[AP1G1, APP, ATP7B, SCAMP2, TMEM165]	GO_CellularComponent-GOA_09.02.2016_16h18	0.046	1	0.046	1	[5, 6, 7, 8, 9, 10, 11]	Group15	9.61539
GO:0033177	proton-transporting two-sector ATPase complex, proton-transporting domain	5	[ATP5I, ATP6V0A1, ATP6V0A2, ATP6V0D1, MON2]	GO_CellularComponent-GOA_09.02.2016_16h18	0.0018	0.15	0.00041	0.015	[3, 4, 5]	Group16	20.8333
GO:0016471	vacuolar proton-transporting V-type ATPase complex	5	[ATP6V0A1, ATP6V0A2, ATP6V0D1, ATP6V1F, ATP6V1H]	GO_CellularComponent-GOA_09.02.2016_16h18	0.00017	0.016	0.00041	0.015	[4, 5, 6, 7, 8, 9, 10]	Group16	33.3333
GO:0042765	GPI-anchor transamidase complex	5	[GPAA1, PIGK, PIGS, PIGT, PIGU]	GO_CellularComponent-GOA_09.02.2016_16h18	7.7e-08	1e-05	7.7e-08	3.8e-06	[3, 4, 5, 6, 7, 8, 9, 10, 11, 12]	Group22	100
GO:0005790	smooth endoplasmic reticulum	5	[APP, PLCB4, PSEN1, STX17, SYVN1]	GO_CellularComponent-GOA_09.02.2016_16h18	0.0076	0.61	0.14	1	[4, 5, 6, 7, 8]	Group24	15.1515
GO:0030120	vesicle coat	5	[C3orf58, PICALM, TMED3, TMED7, VMA21]	GO_CellularComponent-GOA_09.02.2016_16h18	0.034	1	1.9e-09	1e-07	[4, 5, 6, 7, 8, 9, 10, 11]	Group31	10.4167
GO:0044853	plasma membrane raft	5	[ATP1B3, HMOX1, SCARB1, SMO, SMPD2]	GO_CellularComponent-GOA_09.02.2016_16h18	0.41	1	0.41	1	[3, 4, 5, 6, 7]	Group33	5.26316
GO:0005901	caveola	5	[ATP1B3, HMOX1, SCARB1, SMO, SMPD2]	GO_CellularComponent-GOA_09.02.2016_16h18	0.25	1	0.41	1	[4, 5, 6, 7, 8]	Group33	5.95238
GO:0070160	occluding junction	5	[ATP7B, CXADR, JAM3, PXMP2, TGFBR1]	GO_CellularComponent-GOA_09.02.2016_16h18	0.8	0.8	0.84	1	[3]	Group38	4.13223
GO:0005923	bicellular tight junction	5	[ATP7B, CXADR, JAM3, PXMP2, TGFBR1]	GO_CellularComponent-GOA_09.02.2016_16h18	0.8	1	0.84	1	[4]	Group38	4.20168
GO:0016528	sarcoplasm	5	[ASPH, JPH1, POMT1, RTN2, SAR1A]	GO_CellularComponent-GOA_09.02.2016_16h18	0.19	1	0.13	1	[4, 5, 6]	Group43	6.94444
GO:0016529	sarcoplasmic reticulum	5	[ASPH, JPH1, POMT1, RTN2, SAR1A]	GO_CellularComponent-GOA_09.02.2016_16h18	0.1	1	0.13	1	[4, 5, 6, 7, 8]	Group43	7.69231
GO:0031228	intrinsic component of Golgi membrane	5	[GALNT2, QSOX2, RER1, TVP23C, UBIAD1]	GO_CellularComponent-GOA_09.02.2016_16h18	0.053	1	0.053	1	[3, 4, 5, 6, 7, 8, 9, 10]	Group6	9.25926
GO:0030173	integral component of Golgi membrane	5	[GALNT2, QSOX2, RER1, TVP23C, UBIAD1]	GO_CellularComponent-GOA_09.02.2016_16h18	0.037	1	0.053	1	[4, 5, 6, 7, 8, 9, 10, 11]	Group6	10.2041
GO:0000153	cytoplasmic ubiquitin ligase complex	5	[AMFR, AUP1, OS9, SEL1L, SYVN1]	GO_CellularComponent-GOA_09.02.2016_16h18	0.00011	0.011	4.8e-08	2.4e-06	[4, 5, 6, 7]	Group61	35.7143
GO:0000835	ER ubiquitin ligase complex	5	[AMFR, AUP1, OS9, SEL1L, SYVN1]	GO_CellularComponent-GOA_09.02.2016_16h18	4.5e-07	5.7e-05	4.8e-08	2.4e-06	[3, 4, 5, 6, 7, 8, 9, 10]	Group61	83.3333
GO:0000836	Hrd1p ubiquitin ligase complex	5	[AMFR, AUP1, OS9, SEL1L, SYVN1]	GO_CellularComponent-GOA_09.02.2016_16h18	7.7e-08	1e-05	4.8e-08	2.4e-06	[4, 5, 6, 7, 8, 9, 10, 11]	Group61	100
GO:0001669	acrosomal vesicle	5	[ATP6V0A2, CXADR, FNDC3A, POMT1, VEZT]	GO_CellularComponent-GOA_09.02.2016_16h18	0.43	1	0.22	1	[3, 4, 5, 7, 8, 9, 10, 11]	Group65	4.9505
GO:0031306	intrinsic component of mitochondrial outer membrane	5	[ARMCX3, CPT1A, RHOT1, RHOT2, SYNJ2BP]	GO_CellularComponent-GOA_09.02.2016_16h18	0.0011	0.1	0.0011	0.041	[4, 5, 6, 7, 8, 9, 10, 11, 12, 13]	Group8	22.7273
GO:0031307	integral component of mitochondrial outer membrane	5	[ARMCX3, CPT1A, RHOT1, RHOT2, SYNJ2BP]	GO_CellularComponent-GOA_09.02.2016_16h18	0.00095	0.086	0.0011	0.041	[5, 6, 7, 8, 9, 10, 11, 12, 13, 14]	Group8	23.8095
GO:0005640	nuclear outer membrane	4	[DHCR7, PSEN1, RETSAT, SIGMAR1]	GO_CellularComponent-GOA_09.02.2016_16h18	0.011	0.89	0.011	0.38	[2, 3, 4, 5, 6, 7, 8, 9, 10, 11]	Group17	16.6667
GO:0005643	nuclear pore	4	[AAAS, MAD2L1, NDC1, PIK3R4]	GO_CellularComponent-GOA_09.02.2016_16h18	0.53	1	0.53	1	[4, 5, 6, 7, 8, 9, 10]	Group20	5.26316
GO:0043195	terminal bouton	4	[APP, DNAJC5, ILK, SV2A]	GO_CellularComponent-GOA_09.02.2016_16h18	0.35	1	0.00056	0.02	[3, 4, 5, 6, 7, 8]	Group23	5.47945
GO:0005775	vacuolar lumen	4	[GLA, LAMP2, MTCH1, SCARB2]	GO_CellularComponent-GOA_09.02.2016_16h18	0.78	1	0.78	1	[4, 5, 6, 7, 8, 9]	Group25	4.08163
GO:0043202	lysosomal lumen	4	[GLA, LAMP2, MTCH1, SCARB2]	GO_CellularComponent-GOA_09.02.2016_16h18	0.78	1	0.78	1	[5, 6, 7, 8, 9, 10]	Group25	4.30108
GO:0030175	filopodium	4	[APBB1, APP, CXADR, UBE2Q1]	GO_CellularComponent-GOA_09.02.2016_16h18	0.78	1	1	1	[4, 5]	Group28	4.16667
GO:0044322	endoplasmic reticulum quality control compartment	4	[ERLEC1, MAN1B1, RHBDD1, SYVN1]	GO_CellularComponent-GOA_09.02.2016_16h18	0.00012	0.012	0.00012	0.0051	[4, 5, 6, 7, 8, 9]	Group29	50
GO:0005744	mitochondrial inner membrane presequence translocase complex	4	[PAM16, TIMM17A, TIMM17B, TIMM23]	GO_CellularComponent-GOA_09.02.2016_16h18	0.00022	0.02	0.00022	0.0087	[4, 5, 6, 7, 8, 9, 10, 11, 12, 13]	Group44	44.4444
GO:0031526	brush border membrane	4	[MFSD10, SLC19A1, SLC27A4, SLC5A6]	GO_CellularComponent-GOA_09.02.2016_16h18	0.28	1	0.67	1	[4, 5, 6, 7, 8]	Group45	6.77966
GO:0000421	autophagosome membrane	4	[ATG9A, STX17, TM9SF1, VMP1]	GO_CellularComponent-GOA_09.02.2016_16h18	0.02	1	0.0011	0.04	[4, 5, 6, 7, 8, 9, 10]	Group51	14.2857
GO:0030140	trans-Golgi network transport vesicle	4	[IGF2R, SORT1, TMED10, TMED9]	GO_CellularComponent-GOA_09.02.2016_16h18	0.023	1	2.2e-06	0.0001	[4, 5, 6, 7, 8, 9, 10, 11]	Group63	13.7931
GO:0061617	MICOS complex	4	[APOO, APOOL, C19orf70, CHCHD3]	GO_CellularComponent-GOA_09.02.2016_16h18	0.00012	0.012	1.5e-46	9.8e-45	[4, 5, 6, 7, 8, 9, 10, 11, 12, 13, 14, 15]	Group7	50
GO:0031082	BLOC complex	3	[PI4K2A, SNAP47, STX12]	GO_CellularComponent-GOA_09.02.2016_16h18	0.043	1	0.043	1	[3, 5, 6, 7, 8, 9]	Group0	14.2857
GO:0031083	BLOC-1 complex	3	[PI4K2A, SNAP47, STX12]	GO_CellularComponent-GOA_09.02.2016_16h18	0.021	1	0.043	1	[4, 6, 7, 8, 9, 10]	Group0	18.75
GO:0031904	endosome lumen	3	[APP, LNPEP, RAB32]	GO_CellularComponent-GOA_09.02.2016_16h18	0.081	1	0.081	1	[4, 5, 6, 7, 8, 9]	Group10	11.1111
GO:0033178	proton-transporting two-sector ATPase complex, catalytic domain	3	[ATP6AP1, ATP6V1F, ATP6V1H]	GO_CellularComponent-GOA_09.02.2016_16h18	0.024	1	0.00041	0.015	[3, 4, 5]	Group16	17.6471
GO:0045259	proton-transporting ATP synthase complex	3	[ATP5I, MON2, USMG5]	GO_CellularComponent-GOA_09.02.2016_16h18	0.061	1	0.00041	0.015	[3, 4, 5]	Group16	12.5
GO:0033179	proton-transporting V-type ATPase, V0 domain	3	[ATP6V0A1, ATP6V0A2, ATP6V0D1]	GO_CellularComponent-GOA_09.02.2016_16h18	0.0053	0.44	0.00041	0.015	[4, 5, 6]	Group16	30
GO:0033180	proton-transporting V-type ATPase, V1 domain	3	[ATP6AP1, ATP6V1F, ATP6V1H]	GO_CellularComponent-GOA_09.02.2016_16h18	0.0038	0.32	0.00041	0.015	[4, 5, 6]	Group16	33.3333
GO:0005753	mitochondrial proton-transporting ATP synthase complex	3	[ATP5I, MON2, USMG5]	GO_CellularComponent-GOA_09.02.2016_16h18	0.054	1	0.00041	0.015	[4, 5, 6, 7, 8, 9, 10, 11, 12, 13]	Group16	13.0435
GO:0034704	calcium channel complex	3	[ASPH, HERPUD1, MCU]	GO_CellularComponent-GOA_09.02.2016_16h18	0.51	1	0.51	1	[6, 7, 8]	Group18	4.7619
GO:0042581	specific granule	3	[CLCN3, STX4, STXBP3]	GO_CellularComponent-GOA_09.02.2016_16h18	0.017	1	0.017	0.52	[4, 5, 7, 8, 9, 10, 11]	Group19	20
GO:0031091	platelet alpha granule	3	[APP, STXBP3, VAMP7]	GO_CellularComponent-GOA_09.02.2016_16h18	0.74	1	0.74	1	[4, 5, 7, 8, 9, 10, 11]	Group2	4.41176
GO:0042734	presynaptic membrane	3	[APBB1, PI4K2A, PICALM]	GO_CellularComponent-GOA_09.02.2016_16h18	0.49	1	0.49	1	[3, 4, 5, 6, 7, 8]	Group21	5
GO:0043198	dendritic shaft	3	[APP, ILK, PSEN1]	GO_CellularComponent-GOA_09.02.2016_16h18	0.24	1	0.00056	0.02	[3, 4, 5, 6]	Group23	6.66667
GO:0044304	main axon	3	[APBB1, APP, CADM1]	GO_CellularComponent-GOA_09.02.2016_16h18	0.75	1	0.00056	0.02	[4, 5, 6, 7]	Group23	4.22535
GO:0030672	synaptic vesicle membrane	3	[SCAMP1, SV2A, SYNGR2]	GO_CellularComponent-GOA_09.02.2016_16h18	0.47	1	0.00056	0.02	[2, 3, 4, 5, 6, 7, 8, 9, 10, 11, 12]	Group23	5.35714
GO:0099501	exocytic vesicle membrane	3	[SCAMP1, SV2A, SYNGR2]	GO_CellularComponent-GOA_09.02.2016_16h18	0.47	1	0.00056	0.02	[4, 5, 6, 7, 8, 9, 10, 11]	Group23	5.35714
GO:0044216	other organism cell	3	[DERL1, LMAN1, PI4K2A]	GO_CellularComponent-GOA_09.02.2016_16h18	0.024	1	0.024	0.67	[2, 3]	Group26	17.6471
GO:0043657	host cell	3	[DERL1, LMAN1, PI4K2A]	GO_CellularComponent-GOA_09.02.2016_16h18	0.014	1	0.024	0.67	[3, 4]	Group26	21.4286
GO:0044232	organelle membrane contact site	3	[ESYT2, PIK3R4, STX17]	GO_CellularComponent-GOA_09.02.2016_16h18	0.0071	0.58	0.0071	0.23	[2, 3]	Group27	27.2727
GO:0045277	respiratory chain complex IV	3	[COX4I1, COX7B, NDUFA4]	GO_CellularComponent-GOA_09.02.2016_16h18	0.011	0.89	3.5e-13	2e-11	[3, 4, 5]	Group37	23.0769
GO:0045275	respiratory chain complex III	3	[BCS1L, UQCC3, UQCR10]	GO_CellularComponent-GOA_09.02.2016_16h18	0.0038	0.32	3.5e-13	2e-11	[3, 4, 5, 6]	Group37	33.3333
GO:0005750	mitochondrial respiratory chain complex III	3	[BCS1L, UQCC3, UQCR10]	GO_CellularComponent-GOA_09.02.2016_16h18	0.0026	0.22	3.5e-13	2e-11	[4, 5, 6, 7, 8, 9, 10, 11, 12, 13]	Group37	37.5
GO:0044291	cell-cell contact zone	3	[CXADR, GJA1, JAM3]	GO_CellularComponent-GOA_09.02.2016_16h18	0.75	1	0.84	1	[3]	Group38	4.16667
GO:0098827	endoplasmic reticulum subcompartment	3	[ASPH, KIAA1715, RTN2]	GO_CellularComponent-GOA_09.02.2016_16h18	0.024	1	0.13	1	[4, 5, 6, 7, 8, 9]	Group43	17.6471
GO:0005787	signal peptidase complex	3	[SPCS1, SPCS2, SPCS3]	GO_CellularComponent-GOA_09.02.2016_16h18	5.4e-05	0.0056	5.4e-05	0.0022	[3, 4, 5, 6, 7, 8, 9, 10]	Group50	100
GO:0000407	pre-autophagosomal structure	3	[ATG9A, STX12, VMP1]	GO_CellularComponent-GOA_09.02.2016_16h18	0.12	1	0.0011	0.04	[4, 5, 6, 7]	Group51	9.375
GO:0005797	Golgi medial cisterna	3	[GOLGA5, GOSR1, TMEM59]	GO_CellularComponent-GOA_09.02.2016_16h18	0.0038	0.32	0.0038	0.13	[6, 7, 8, 9, 10, 11, 12]	Group53	33.3333
GO:0030118	clathrin coat	3	[AP1G1, IGF2R, PICALM]	GO_CellularComponent-GOA_09.02.2016_16h18	0.24	1	2.1e-08	1.1e-06	[4, 5, 6, 7, 8]	Group54	6.66667
GO:0030126	COPI vesicle coat	3	[C3orf58, TMED3, TMED7]	GO_CellularComponent-GOA_09.02.2016_16h18	0.014	1	2.1e-08	1.1e-06	[4, 5, 6, 7, 8, 9, 10, 11, 12]	Group54	21.4286
GO:0005881	cytoplasmic microtubule	3	[TMEM214, TUBGCP2, VIMP]	GO_CellularComponent-GOA_09.02.2016_16h18	0.73	1	0.73	1	[4, 5, 6, 7, 8, 9, 10]	Group57	4.6875
GO:0005905	coated pit	3	[APP, PICALM, SORT1]	GO_CellularComponent-GOA_09.02.2016_16h18	0.74	1	0.74	1	[2, 3, 4]	Group58	4.41176
GO:0008250	oligosaccharyltransferase complex	3	[DAD1, MAGT1, STT3B]	GO_CellularComponent-GOA_09.02.2016_16h18	0.0071	0.58	0.0071	0.23	[3, 4, 5, 6, 7, 8, 9, 10]	Group59	27.2727
GO:0016235	aggresome	3	[PSEN1, SEC62, UBQLN1]	GO_CellularComponent-GOA_09.02.2016_16h18	0.19	1	0.036	0.93	[4, 5, 6]	Group60	7.5
GO:0042588	zymogen granule	3	[SCAMP1, TMED10, TMED2]	GO_CellularComponent-GOA_09.02.2016_16h18	0.021	1	0.22	1	[4, 5, 7, 8, 9, 10, 11]	Group65	18.75
GO:0042589	zymogen granule membrane	3	[SCAMP1, TMED10, TMED2]	GO_CellularComponent-GOA_09.02.2016_16h18	0.0038	0.32	0.22	1	[4, 5, 6, 7, 8, 9, 10, 11, 12]	Group65	33.3333
GO:0001772	immunological synapse	3	[SNX27, SPNS1, STX7]	GO_CellularComponent-GOA_09.02.2016_16h18	0.15	1	0.15	1	[3, 4, 5, 6]	Group66	8.33333
GO:0044453	nuclear membrane part	3	[LEMD2, LEMD3, TMEM43]	GO_CellularComponent-GOA_09.02.2016_16h18	0.017	1	4e-07	1.9e-05	[2, 3, 4, 5, 6, 7, 8, 9, 10, 11]	Group9	20
GO:0031229	intrinsic component of nuclear inner membrane	3	[LEMD2, LEMD3, TMEM43]	GO_CellularComponent-GOA_09.02.2016_16h18	0.014	1	4e-07	1.9e-05	[3, 4, 5, 6, 7, 8, 9, 10, 11, 12]	Group9	21.4286
GO:0005639	integral component of nuclear inner membrane	3	[LEMD2, LEMD3, TMEM43]	GO_CellularComponent-GOA_09.02.2016_16h18	0.014	1	4e-07	1.9e-05	[4, 5, 6, 7, 8, 9, 10, 11, 12, 13]	Group9	21.4286

## Sheet: VLGR1CTF RPE1 preys
		ARF5	ADP-ribosylation factor 5; GTP-binding protein that functions as an allosteric activator of the cholera toxin catalytic subunit, an ADP- ribosyltransferase. Involved in protein trafficking; may modulate vesicle budding and uncoating within the Golgi apparatus (180 aa)
		ITGA3	integrin, alpha 3 (antigen CD49C, alpha 3 subunit of VLA-3 receptor); Integrin alpha-3/beta-1 is a receptor for fibronectin, laminin, collagen, epiligrin, thrombospondin and CSPG4. Alpha- 3/beta-1 may mediate with LGALS3 the stimulation by CSPG4 of endothelial cells migration (1066 aa)
		COX15	cytochrome c oxidase assembly homolog 15 (yeast); May be involved in the biosynthesis of heme A (410 aa)
		PSMA4	proteasome (prosome, macropain) subunit, alpha type, 4; The proteasome is a multicatalytic proteinase complex which is characterized by its ability to cleave peptides with Arg, Phe, Tyr, Leu, and Glu adjacent to the leaving group at neutral or slightly basic pH. The proteasome has an ATP-dependent proteolytic activity (By similarity) (261 aa)
		PSMC4	proteasome (prosome, macropain) 26S subunit, ATPase, 4; The 26S protease is involved in the ATP-dependent degradation of ubiquitinated proteins. The regulatory (or ATPase) complex confers ATP dependency and substrate specificity to the 26S complex (418 aa)
		DERL2	derlin 2; Functional component of endoplasmic reticulum-associated degradation (ERAD) for misfolded lumenal glycoproteins, but not that of misfolded nonglycoproteins. May act by forming a channel that allows the retrotranslocation of misfolded glycoproteins into the cytosol where they are ubiquitinated and degraded by the proteasome. May mediate the interaction between VCP and the degradation sub…
		TRAM2	translocation associated membrane protein 2; Necessary for collagen type I synthesis. May couple the activity of the ER Ca(2+) pump SERCA2B with the activity of the translocon. This coupling may increase the local Ca(2+) concentration at the site of collagen synthesis, and a high Ca(2+) concentration may be necessary for the function of molecular chaperones involved in collagen folding (370 aa)
		ERLEC1	endoplasmic reticulum lectin 1; Probable lectin that binds selectively to improperly folded lumenal proteins. May function in endoplasmic reticulum quality control and endoplasmic reticulum-associated degradation (ERAD) of both non-glycosylated proteins and glycoproteins (483 aa)
		PLOD1	procollagen-lysine, 2-oxoglutarate 5-dioxygenase 1; Forms hydroxylysine residues in -Xaa-Lys-Gly- sequences in collagens. These hydroxylysines serve as sites of attachment for carbohydrate units and are essential for the stability of the intermolecular collagen cross-links (727 aa)
		MLF2	myeloid leukemia factor 2 (248 aa)
		KRT23	keratin 23 (histone deacetylase inducible) (422 aa)
		VCL	vinculin; Actin filament (F-actin)-binding protein involved in cell-matrix adhesion and cell-cell adhesion. Regulates cell- surface E-cadherin expression and potentiates mechanosensing by the E-cadherin complex. May also play important roles in cell morphology and locomotion (1134 aa)
		PSMD8	proteasome (prosome, macropain) 26S subunit, non-ATPase, 8; Acts as a regulatory subunit of the 26S proteasome which is involved in the ATP-dependent degradation of ubiquitinated proteins. Necessary for activation of the CDC28 kinase (350 aa)
		ATP5D	ATP synthase, H+ transporting, mitochondrial F1 complex, delta subunit; Mitochondrial membrane ATP synthase (F(1)F(0) ATP synthase or Complex V) produces ATP from ADP in the presence of a proton gradient across the membrane which is generated by electron transport complexes of the respiratory chain. F-type ATPases consist of two structural domains, F(1) - containing the extramembraneous catalytic…
		TECR	trans-2,3-enoyl-CoA reductase; Reduces trans-2,3-stearoyl-CoA to stearoyl-CoA of long and very long chain fatty acids (308 aa)
		LGALS1	lectin, galactoside-binding, soluble, 1; May regulate apoptosis, cell proliferation and cell differentiation. Binds beta-galactoside and a wide array of complex carbohydrates. Inhibits CD45 protein phosphatase activity and therefore the dephosphorylation of Lyn kinase (135 aa)
		MYH9	myosin, heavy chain 9, non-muscle; Cellular myosin that appears to play a role in cytokinesis, cell shape, and specialized functions such as secretion and capping (1960 aa)
		PSMA3	proteasome (prosome, macropain) subunit, alpha type, 3; The proteasome is a multicatalytic proteinase complex which is characterized by its ability to cleave peptides with Arg, Phe, Tyr, Leu, and Glu adjacent to the leaving group at neutral or slightly basic pH. The proteasome has an ATP-dependent proteolytic activity. Binds to the C-terminus of CDKN1A and thereby mediates its degradation. Negati…
		APMAP	adipocyte plasma membrane associated protein; Exhibits strong arylesterase activity with beta-naphthyl acetate and phenyl acetate. May play a role in adipocyte differentiation (416 aa)
		MAGED2	melanoma antigen family D, 2 (606 aa)
		PSMD7	proteasome (prosome, macropain) 26S subunit, non-ATPase, 7; Acts as a regulatory subunit of the 26S proteasome which is involved in the ATP-dependent degradation of ubiquitinated proteins (324 aa)
		FKBP8	FK506 binding protein 8, 38kDa; Constitutively inactive PPiase, which becomes active when bound to calmodulin and calcium. Seems to act as a chaperone for BCL2, targets it to the mitochondria and modulates its phosphorylation state. The BCL2/FKBP8/calmodulin/calcium complex probably interferes with the binding of BCL2 to its targets. The active form of FKBP8 may therefore play a role in the regul…
		CPA4	carboxypeptidase A4; Metalloprotease that could be involved in the histone hyperacetylation pathway (421 aa)
		SERPINE1	serpin peptidase inhibitor, clade E (nexin, plasminogen activator inhibitor type 1), member 1; Serine protease inhibitor. This inhibitor acts as ’bait’ for tissue plasminogen activator, urokinase, protein C and matriptase-3/TMPRSS7. Its rapid interaction with PLAT may function as a major control point in the regulation of fibrinolysis (402 aa)
		PSMA2	proteasome (prosome, macropain) subunit, alpha type, 2; The proteasome is a multicatalytic proteinase complex which is characterized by its ability to cleave peptides with Arg, Phe, Tyr, Leu, and Glu adjacent to the leaving group at neutral or slightly basic pH. The proteasome has an ATP-dependent proteolytic activity. PSMA2 may have a potential regulatory effect on another component(s) of the pr…
		SEC61B	Sec61 beta subunit; Necessary for protein translocation in the endoplasmic reticulum (96 aa)
		SFXN3	sideroflexin 3; Potential iron transporter (325 aa)
		PSMB3	proteasome (prosome, macropain) subunit, beta type, 3; The proteasome is a multicatalytic proteinase complex which is characterized by its ability to cleave peptides with Arg, Phe, Tyr, Leu, and Glu adjacent to the leaving group at neutral or slightly basic pH. The proteasome has an ATP-dependent proteolytic activity (205 aa)
		PFN1	profilin 1; Binds to actin and affects the structure of the cytoskeleton. At high concentrations, profilin prevents the polymerization of actin, whereas it enhances it at low concentrations. By binding to PIP2, it inhibits the formation of IP3 and DG. Inhibits androgen receptor (AR) and HTT aggregation and binding of G-actin is essential for its inhibition of AR (140 aa)
		SLC25A11	solute carrier family 25 (mitochondrial carrier; oxoglutarate carrier), member 11; Catalyzes the transport of 2-oxoglutarate across the inner mitochondrial membrane in an electroneutral exchange for malate or other dicarboxylic acids, and plays an important role in several metabolic processes, including the malate-aspartate shuttle, the oxoglutarate/isocitrate shuttle, in gluconeogenesis from lac…
		CCDC47	coiled-coil domain containing 47 (483 aa)
		SLC25A3	solute carrier family 25 (mitochondrial carrier; phosphate carrier), member 3; Transport of phosphate groups from the cytosol to the mitochondrial matrix. Phosphate is cotransported with H(+). May play a role regulation of the mitochondrial permeability transition pore (mPTP) (362 aa)
		USP5	ubiquitin specific peptidase 5 (isopeptidase T); Cleaves linear and branched multiubiquitin polymers with a marked preference for branched polymers. Involved in unanchored ’Lys-48’-linked polyubiquitin disassembly. Binds linear and ’Lys- 63’-linked polyubiquitin with a lower affinity. Knock-down of USP5 causes the accumulation of p53/TP53 and an increase in p53/TP53 transcriptional activity becau…
		TPI1	triosephosphate isomerase 1 (286 aa)
		LDHB	lactate dehydrogenase B (334 aa)
		TMEM30A	transmembrane protein 30A (361 aa)
		LOX	lysyl oxidase; Responsible for the post-translational oxidative deamination of peptidyl lysine residues in precursors to fibrous collagen and elastin. In addition to cross-linking of extracellular matrix proteins, may have a direct role in tumor suppression (417 aa)
		LTF	lactotransferrin (710 aa)
		ENO1	enolase 1, (alpha) (434 aa)
		WDR77	WD repeat domain 77; Non-catalytic component of the 20S PRMT5-containing methyltransferase complex, which modifies specific arginines to dimethylarginines in several spliceosomal Sm proteins and histones. This modification targets Sm proteins to the survival of motor neurons (SMN) complex for assembly into small nuclear ribonucleoprotein core particles. Might play a role in transcription regulati…
		CTSD	cathepsin D; Acid protease active in intracellular protein breakdown. Involved in the pathogenesis of several diseases such as breast cancer and possibly Alzheimer disease (412 aa)
		RPN2	ribophorin II; Essential subunit of the N-oligosaccharyl transferase (OST) complex which catalyzes the transfer of a high mannose oligosaccharide from a lipid-linked oligosaccharide donor to an asparagine residue within an Asn-X-Ser/Thr consensus motif in nascent polypeptide chains (631 aa)
		PKD2	polycystic kidney disease 2 (autosomal dominant); Involved in fluid-flow mechanosensation by the primary cilium in renal epithelium (By similarity). PKD1 and PKD2 may function through a common signaling pathway that is necessary for normal tubulogenesis (By similarity). Acts as a regulator of cilium length, together with PKD1 (By similarity). The dynamic control of cilium length is essential in t…
		YWHAQ	tyrosine 3-monooxygenase/tryptophan 5-monooxygenase activation protein, theta polypeptide; Adapter protein implicated in the regulation of a large spectrum of both general and specialized signaling pathways. Binds to a large number of partners, usually by recognition of a phosphoserine or phosphothreonine motif. Binding generally results in the modulation of the activity of the binding partner. N…
		CAT	catalase; Occurs in almost all aerobically respiring organisms and serves to protect cells from the toxic effects of hydrogen peroxide. Promotes growth of cells including T-cells, B-cells, myeloid leukemia cells, melanoma cells, mastocytoma cells and normal and transformed fibroblast cells (527 aa)
		SEC61A1	Sec61 alpha 1 subunit (S. cerevisiae) (476 aa)
		SSR1	signal sequence receptor, alpha (286 aa)
		SCGB1D2	secretoglobin, family 1D, member 2; May bind androgens and other steroids, may also bind estramustine, a chemotherapeutic agent used for prostate cancer. May be under transcriptional regulation of steroid hormones (90 aa)
		NCLN	nicalin (563 aa)
		CANX	calnexin; Calcium-binding protein that interacts with newly synthesized glycoproteins in the endoplasmic reticulum. It may act in assisting protein assembly and/or in the retention within the ER of unassembled protein subunits. It seems to play a major role in the quality control apparatus of the ER by the retention of incorrectly folded proteins. Associated with partial T-cell antigen receptor c…
		TUBA4A	tubulin, alpha 4a; Tubulin is the major constituent of microtubules. It binds two moles of GTP, one at an exchangeable site on the beta chain and one at a non-exchangeable site on the alpha chain (By similarity) (448 aa)
		HSPB1	heat shock 27kDa protein 1 (205 aa)
		APOL2	apolipoprotein L, 2 (337 aa)
		RAP1B	RAP1B, member of RAS oncogene family (184 aa)
		RPS16	ribosomal protein S16 (146 aa)
		ESYT2	extended synaptotagmin-like protein 2 (893 aa)
		KRT31	keratin 31 (416 aa)
		KRT6C	keratin 6C (564 aa)
		EMC7	ER membrane protein complex subunit 7 (242 aa)
		SLC38A2	solute carrier family 38, member 2; Functions as a sodium-dependent amino acid transporter. Mediates the saturable, pH-sensitive and electrogenic cotransport of neutral amino acids and sodium ions with a stoichiometry of 1-1. May function in the transport of amino acids at the blood- brain barrier and in the supply of maternal nutrients to the fetus through the placenta (506 aa)
		ANXA1	annexin A1; Calcium/phospholipid-binding protein which promotes membrane fusion and is involved in exocytosis. This protein regulates phospholipase A2 activity. It seems to bind from two to four calcium ions with high affinity (346 aa)
		RINT1	RAD50 interactor 1; Involved in regulation of membrane traffic between the Golgi and the endoplasmic reticulum. May play a role in cell cycle checkpoint control. Essential for telomere length control (792 aa)
		KRT85	keratin 85 (507 aa)
		KRT84	keratin 84 (600 aa)
		PSMB7	proteasome (prosome, macropain) subunit, beta type, 7; The proteasome is a multicatalytic proteinase complex which is characterized by its ability to cleave peptides with Arg, Phe, Tyr, Leu, and Glu adjacent to the leaving group at neutral or slightly basic pH. The proteasome has an ATP-dependent proteolytic activity. This unit is responsible of the trypsin-like activity (277 aa)
		CTSL2	cathepsin L2; Cysteine protease. May have an important role in corneal physiology (334 aa)
		FAM8A1	family with sequence similarity 8, member A1 (413 aa)
		SQRDL	sulfide quinone reductase-like (yeast); Catalyzes the oxidation of hydrogen sulfide, with the help of a quinone (By similarity) (450 aa)
		PSMC1	proteasome (prosome, macropain) 26S subunit, ATPase, 1; The 26S protease is involved in the ATP-dependent degradation of ubiquitinated proteins. The regulatory (or ATPase) complex confers ATP dependency and substrate specificity to the 26S complex (440 aa)
		PSMA6	proteasome (prosome, macropain) subunit, alpha type, 6; The proteasome is a multicatalytic proteinase complex which is characterized by its ability to cleave peptides with Arg, Phe, Tyr, Leu, and Glu adjacent to the leaving group at neutral or slightly basic pH. The proteasome has an ATP-dependent proteolytic activity (By similarity) (246 aa)
		PSMD11	proteasome (prosome, macropain) 26S subunit, non-ATPase, 11; Component of the lid subcomplex of the 26S proteasome, a multiprotein complex involved in the ATP-dependent degradation of ubiquitinated proteins. In the complex, PSMD11 is required for proteasome assembly. Plays a key role in increased proteasome activity in embryonic stem cells (ESCs)- its high expression in ESCs promotes enhanced ass…
		BLMH	bleomycin hydrolase; The normal physiological role of BLM hydrolase is unknown, but it catalyzes the inactivation of the antitumor drug BLM (a glycopeptide) by hydrolyzing the carboxamide bond of its B- aminoalaninamide moiety thus protecting normal and malignant cells from BLM toxicity (By similarity) (455 aa)
		PTPLAD1	protein tyrosine phosphatase-like A domain containing 1 (362 aa)
		FAF2	Fas associated factor family member 2; May play a role in the translocation of terminally misfolded proteins from the endoplasmic reticulum lumen to the cytoplasm and their degradation by the proteasome (445 aa)
		ATP5B	ATP synthase, H+ transporting, mitochondrial F1 complex, beta polypeptide; Mitochondrial membrane ATP synthase (F(1)F(0) ATP synthase or Complex V) produces ATP from ADP in the presence of a proton gradient across the membrane which is generated by electron transport complexes of the respiratory chain. F-type ATPases consist of two structural domains, F(1) - containing the extramembraneous cataly…
		LPCAT2	lysophosphatidylcholine acyltransferase 2; Possesses both acyltransferase and acetyltransferase activities. Activity is calcium-dependent. Involved in platelet- activating factor (PAF) biosynthesis by catalyzing the conversion of the PAF precursor, 1-O-alkyl-sn-glycero-3-phosphocholine (lyso- PAF) into 1-O-alkyl-2-acetyl-sn-glycero-3-phosphocholine (PAF). Also converts lyso-PAF to 1-alkyl-phospha…
		DNAJB6	DnaJ (Hsp40) homolog, subfamily B, member 6 (326 aa)
		PSMB1	proteasome (prosome, macropain) subunit, beta type, 1; The proteasome is a multicatalytic proteinase complex which is characterized by its ability to cleave peptides with Arg, Phe, Tyr, Leu, and Glu adjacent to the leaving group at neutral or slightly basic pH. The proteasome has an ATP-dependent proteolytic activity (By similarity) (241 aa)
		ALG1	asparagine-linked glycosylation 1, beta-1,4-mannosyltransferase homolog (S. cerevisiae); Participates in the formation of the lipid-linked precursor oligosaccharide for N-glycosylation. Involved in assembling the dolichol-pyrophosphate-GlcNAc(2)-Man(5) intermediate on the cytoplasmic surface of the ER (464 aa)
		DNAJA3	DnaJ (Hsp40) homolog, subfamily A, member 3; Modulates apoptotic signal transduction or effector structures within the mitochondrial matrix. Affect cytochrome C release from the mitochondria and caspase 3 activation, but not caspase 8 activation. Isoform 1 increases apoptosis triggered by both TNF and the DNA-damaging agent mytomycin C; in sharp contrast, isoform 2 suppresses apoptosis. Can modul…
		RPL8	ribosomal protein L8 (257 aa)
		PRDX1	peroxiredoxin 1; Involved in redox regulation of the cell. Reduces peroxides with reducing equivalents provided through the thioredoxin system but not from glutaredoxin. May play an important role in eliminating peroxides generated during metabolism. Might participate in the signaling cascades of growth factors and tumor necrosis factor-alpha by regulating the intracellular concentrations of H(2)…
		POF1B	premature ovarian failure, 1B; May be involved in ovary development (589 aa)
		SPCS2	signal peptidase complex subunit 2 homolog (S. cerevisiae); Component of the microsomal signal peptidase complex which removes signal peptides from nascent proteins as they are translocated into the lumen of the endoplasmic reticulum (By similarity) (226 aa)
		PKP1	plakophilin 1 (ectodermal dysplasia/skin fragility syndrome); Seems to play a role in junctional plaques. Contributes to epidermal morphogenesis (747 aa)
		HAT1	histone acetyltransferase 1; Acetylates soluble but not nucleosomal histone H4 at ’Lys-5’ (H4K5ac) and ’Lys-12’ (H4K12ac) and, to a lesser extent, acetylates histone H2A at ’Lys-5’ (H2AK5ac). Has intrinsic substrate specificity that modifies lysine in recognition sequence GXGKXG. May be involved in nucleosome assembly during DNA replication and repair as part of the histone H3.1 and H3.3 complexe…
		YWHAE	tyrosine 3-monooxygenase/tryptophan 5-monooxygenase activation protein, epsilon polypeptide (255 aa)
		PSMD3	proteasome (prosome, macropain) 26S subunit, non-ATPase, 3; Acts as a regulatory subunit of the 26 proteasome which is involved in the ATP-dependent degradation of ubiquitinated proteins (534 aa)
		CAD	carbamoyl-phosphate synthetase 2, aspartate transcarbamylase, and dihydroorotase; This protein is a "fusion" protein encoding four enzymatic activities of the pyrimidine pathway (GATase, CPSase, ATCase and DHOase) (2225 aa)
		RAB10	RAB10, member RAS oncogene family; The small GTPases Rab are key regulators of intracellular membrane trafficking, from the formation of transport vesicles to their fusion with membranes. Rabs cycle between an inactive GDP-bound form and an active GTP-bound form that is able to recruit to membranes different set of downstream effectors directly responsible for vesicle formation, movement, tetheri…
		VDAC1	voltage-dependent anion channel 1; Forms a channel through the mitochondrial outer membrane and also the plasma membrane. The channel at the outer mitochondrial membrane allows diffusion of small hydrophilic molecules; in the plasma membrane it is involved in cell volume regulation and apoptosis. It adopts an open conformation at low or zero membrane potential and a closed conformation at potenti…
		IDE	insulin-degrading enzyme; Plays a role in the cellular breakdown of insulin, IAPP, glucagon, bradykinin, kallidin and other peptides, and thereby plays a role in intercellular peptide signaling. Degrades amyloid formed by APP and IAPP. May play a role in the degradation and clearance of naturally secreted amyloid beta-protein by neurons and microglia (1019 aa)
		NDUFA9	NADH dehydrogenase (ubiquinone) 1 alpha subcomplex, 9, 39kDa; Accessory subunit of the mitochondrial membrane respiratory chain NADH dehydrogenase (Complex I), that is believed not to be involved in catalysis. Complex I functions in the transfer of electrons from NADH to the respiratory chain. The immediate electron acceptor for the enzyme is believed to be ubiquinone (377 aa)
		TMPO	thymopoietin; May help direct the assembly of the nuclear lamina and thereby help maintain the structural organization of the nuclear envelope. Possible receptor for attachment of lamin filaments to the inner nuclear membrane. May be involved in the control of initiation of DNA replication through its interaction with NAKAP95 (694 aa)
		ESYT1	extended synaptotagmin-like protein 1; May play a role as calcium-regulated intrinsic membrane protein (By similarity) (1114 aa)
		SCAMP2	secretory carrier membrane protein 2; Functions in post-Golgi recycling pathways. Acts as a recycling carrier to the cell surface (329 aa)
		SEC11A	SEC11 homolog A (S. cerevisiae); Component of the microsomal signal peptidase complex which removes signal peptides from nascent proteins as they are translocated into the lumen of the endoplasmic reticulum (By similarity) (179 aa)
		UQCRC2	ubiquinol-cytochrome c reductase core protein II; This is a component of the ubiquinol-cytochrome c reductase complex (complex III or cytochrome b-c1 complex), which is part of the mitochondrial respiratory chain. The core protein 2 is required for the assembly of the complex (453 aa)
		CLTC	clathrin, heavy chain (Hc); Clathrin is the major protein of the polyhedral coat of coated pits and vesicles. Two different adapter protein complexes link the clathrin lattice either to the plasma membrane or to the trans-Golgi network (1675 aa)
		AFG3L2	AFG3 ATPase family member 3-like 2 (S. cerevisiae); ATP-dependent protease which is essential for axonal development (By similarity) (797 aa)
		GALNT1	UDP-N-acetyl-alpha-D-galactosamine-polypeptide N-acetylgalactosaminyltransferase 1 (GalNAc-T1); Catalyzes the initial reaction in O-linked oligosaccharide biosynthesis, the transfer of an N-acetyl-D- galactosamine residue to a serine or threonine residue on the protein receptor. Has a broad spectrum of substrates for peptides such as EA2, Muc5AC, Muc1a, Muc1b and Muc7 (559 aa)
		SERPINB12	serpin peptidase inhibitor, clade B (ovalbumin), member 12; Inhibits trypsin and plasmin, but not thrombin, coagulation factor Xa, or urokinase-type plasminogen activator (405 aa)
		PSMB6	proteasome (prosome, macropain) subunit, beta type, 6; The proteasome is a multicatalytic proteinase complex which is characterized by its ability to cleave peptides with Arg, Phe, Tyr, Leu, and Glu adjacent to the leaving group at neutral or slightly basic pH. The proteasome has an ATP-dependent proteolytic activity. This unit is responsible of the peptidyl glutamyl-like activity. May catalyze b…
		RPS11	ribosomal protein S11 (158 aa)
		PSMA5	proteasome (prosome, macropain) subunit, alpha type, 5; The proteasome is a multicatalytic proteinase complex which is characterized by its ability to cleave peptides with Arg, Phe, Tyr, Leu, and Glu adjacent to the leaving group at neutral or slightly basic pH. The proteasome has an ATP-dependent proteolytic activity (By similarity) (241 aa)
		NONO	non-POU domain containing, octamer-binding; DNA- and RNA binding protein, involved in several nuclear processes. Binds the conventional octamer sequence in double stranded DNA. Also binds single-stranded DNA and RNA at a site independent of the duplex site (By similarity). Involved in pre-mRNA splicing, probably as a heterodimer with SFPQ. Interacts with U5 snRNA, probably by binding to a purine-…
		ERLIN2	ER lipid raft associated 2; Component of the ERLIN1/ERLIN2 complex which mediates the endoplasmic reticulum-associated degradation (ERAD) of inositol 1,4,5-trisphosphate receptors (IP3Rs). Also involved in ITPR1 degradation by the ERAD pathway (339 aa)
		SIGMAR1	sigma non-opioid intracellular receptor 1 (223 aa)
		HSD17B12	hydroxysteroid (17-beta) dehydrogenase 12; Catalyzes the transformation of estrone (E1) into estradiol (E2), suggesting a central role in estrogen formation. Its strong expression in ovary and mammary gland suggest that it may constitute the major enzyme responsible for the conversion of E1 to E2 in women. Also has 3-ketoacyl-CoA reductase activity, reducing both long chain 3-ketoacyl-CoAs and lo…
		ATP5A1	ATP synthase, H+ transporting, mitochondrial F1 complex, alpha subunit 1, cardiac muscle; Mitochondrial membrane ATP synthase (F(1)F(0) ATP synthase or Complex V) produces ATP from ADP in the presence of a proton gradient across the membrane which is generated by electron transport complexes of the respiratory chain. F-type ATPases consist of two structural domains, F(1) - containing the extramem…
		GJA1	gap junction protein, alpha 1, 43kDa; Gap junction protein that acts as a regulator of bladder capacity. A gap junction consists of a cluster of closely packed pairs of transmembrane channels, the connexons, through which materials of low MW diffuse from one cell to a neighboring cell. May play a critical role in the physiology of hearing by participating in the recycling of potassium to the coch…
		PLOD2	procollagen-lysine, 2-oxoglutarate 5-dioxygenase 2; Forms hydroxylysine residues in -Xaa-Lys-Gly- sequences in collagens. These hydroxylysines serve as sites of attachment for carbohydrate units and are essential for the stability of the intermolecular collagen cross-links (758 aa)
		LPCAT1	lysophosphatidylcholine acyltransferase 1; Possesses both acyltransferase and acetyltransferase activities. Activity is calcium-independent. Mediates the conversion of 1-acyl-sn-glycero-3-phosphocholine (LPC) into phosphatidylcholine (PC). Displays a clear preference for saturated fatty acyl-CoAs, and 1-myristoyl or 1-palmitoyl LPC as acyl donors and acceptors, respectively. May synthesize phosph…
		SERPINB3	serpin peptidase inhibitor, clade B (ovalbumin), member 3 (390 aa)
		ATP1B3	ATPase, Na+/K+ transporting, beta 3 polypeptide; This is the non-catalytic component of the active enzyme, which catalyzes the hydrolysis of ATP coupled with the exchange of Na(+) and K(+) ions across the plasma membrane. The exact function of the beta-3 subunit is not known (279 aa)
		PSMB4	proteasome (prosome, macropain) subunit, beta type, 4; The proteasome is a multicatalytic proteinase complex which is characterized by its ability to cleave peptides with Arg, Phe, Tyr, Leu, and Glu adjacent to the leaving group at neutral or slightly basic pH. The proteasome has an ATP-dependent proteolytic activity. Mediates the lipopolysaccharide-induced signal macrophage proteasome (By simila…
		PIP	prolactin-induced protein (146 aa)
		AZGP1	alpha-2-glycoprotein 1, zinc-binding; Stimulates lipid degradation in adipocytes and causes the extensive fat losses associated with some advanced cancers. May bind polyunsaturated fatty acids (298 aa)
		PSMC2	proteasome (prosome, macropain) 26S subunit, ATPase, 2; The 26S protease is involved in the ATP-dependent degradation of ubiquitinated proteins. The regulatory (or ATPase) complex confers ATP dependency and substrate specificity to the 26S complex. In case of HIV-1 infection, positive modulator of Tat-mediated transactivation (433 aa)
		KRT8	keratin 8 (483 aa)
		EIF4A1	eukaryotic translation initiation factor 4A1; ATP-dependent RNA helicase which is a subunit of the eIF4F complex involved in cap recognition and is required for mRNA binding to ribosome. In the current model of translation initiation, eIF4A unwinds RNA secondary structures in the 5’-UTR of mRNAs which is necessary to allow efficient binding of the small ribosomal subunit, and subsequent scanning …
		NCSTN	nicastrin; Essential subunit of the gamma-secretase complex, an endoprotease complex that catalyzes the intramembrane cleavage of integral membrane proteins such as Notch receptors and APP (beta- amyloid precursor protein). It probably represents a stabilizing cofactor required for the assembly of the gamma-secretase complex (709 aa)
		ATP1A1	ATPase, Na+/K+ transporting, alpha 1 polypeptide; This is the catalytic component of the active enzyme, which catalyzes the hydrolysis of ATP coupled with the exchange of sodium and potassium ions across the plasma membrane. This action creates the electrochemical gradient of sodium and potassium ions, providing the energy for active transport of various nutrients (1023 aa)
		CCT3	chaperonin containing TCP1, subunit 3 (gamma); Molecular chaperone; assists the folding of proteins upon ATP hydrolysis. As part of the BBS/CCT complex may play a role in the assembly of BBSome, a complex involved in ciliogenesis regulating transports vesicles to the cilia. Known to play a role, in vitro, in the folding of actin and tubulin (545 aa)
		STT3B	STT3, subunit of the oligosaccharyltransferase complex, homolog B (S. cerevisiae); Catalytic subunit of the N-oligosaccharyl transferase (OST) complex which catalyzes the transfer of a high mannose oligosaccharide from a lipid-linked oligosaccharide donor to an asparagine residue within an Asn-X-Ser/Thr consensus motif in nascent polypeptide chains. N-glycosylation occurs cotranslationally and th…
		RETSAT	retinol saturase (all-trans-retinol 13,14-reductase); Retinol saturase carrying out the saturation of the 13- 14 double bond of all-trans-retinol to produce all-trans-13,14- dihydroretinol. Has activity toward all-trans-retinol as substrate. Does not use all-trans-retinoic acid nor 9-cis, 11-cis or 13-cis-retinol isomers as substrates. May play a role in the metabolism of vitamin A (By similarity…
		RPN1	ribophorin I; Essential subunit of the N-oligosaccharyl transferase (OST) complex which catalyzes the transfer of a high mannose oligosaccharide from a lipid-linked oligosaccharide donor to an asparagine residue within an Asn-X-Ser/Thr consensus motif in nascent polypeptide chains (607 aa)
		ANXA5	annexin A5; This protein is an anticoagulant protein that acts as an indirect inhibitor of the thromboplastin-specific complex, which is involved in the blood coagulation cascade (320 aa)
		HSPA9	heat shock 70kDa protein 9 (mortalin) (679 aa)
		FABP5	fatty acid binding protein 5 (psoriasis-associated); High specificity for fatty acids. Highest affinity for C18 chain length. Decreasing the chain length or introducing double bonds reduces the affinity. May be involved in keratinocyte differentiation (135 aa)
		PRDX3	peroxiredoxin 3; Involved in redox regulation of the cell. Protects radical-sensitive enzymes from oxidative damage by a radical- generating system. Acts synergistically with MAP3K13 to regulate the activation of NF-kappa-B in the cytosol (256 aa)
		PSMC3	proteasome (prosome, macropain) 26S subunit, ATPase, 3; The 26S protease is involved in the ATP-dependent degradation of ubiquitinated proteins. The regulatory (or ATPase) complex confers ATP dependency and substrate specificity to the 26S complex (By similarity). In case of HIV-1 infection, suppresses Tat-mediated transactivation (439 aa)
		TMX3	thioredoxin-related transmembrane protein 3; Probable disulfide isomerase, which participates in the folding of proteins containing disulfide bonds. May act as a dithiol oxidase (454 aa)
		A2ML1	alpha-2-macroglobulin-like 1; Is able to inhibit all four classes of proteinases by a unique ’trapping’ mechanism. This protein has a peptide stretch, called the ’bait region’ which contains specific cleavage sites for different proteinases. When a proteinase cleaves the bait region, a conformational change is induced in the protein which traps the proteinase. The entrapped enzyme remains active …
		HSP90B1	heat shock protein 90kDa beta (Grp94), member 1; Molecular chaperone that functions in the processing and transport of secreted proteins. When associated with CNPY3, required for proper folding of Toll-like receptors (By similarity). Functions in endoplasmic reticulum associated degradation (ERAD). Has ATPase activity (803 aa)
		PPIB	peptidylprolyl isomerase B (cyclophilin B); PPIases accelerate the folding of proteins. It catalyzes the cis-trans isomerization of proline imidic peptide bonds in oligopeptides (216 aa)
		PHB	prohibitin; Prohibitin inhibits DNA synthesis. It has a role in regulating proliferation. As yet it is unclear if the protein or the mRNA exhibits this effect. May play a role in regulating mitochondrial respiration activity and in aging (272 aa)
		SLC27A4	solute carrier family 27 (fatty acid transporter), member 4; Involved in translocation of long-chain fatty acids (LFCA) across the plasma membrane. Appears to be the principal fatty acid transporter in small intestinal enterocytes. Plays a role in the formation of the epidermal barrier. Required for fat absorption in early embryogenesis. Has acyl-CoA ligase activity for long-chain and very-long-c…
		PRDX2	peroxiredoxin 2; Involved in redox regulation of the cell. Reduces peroxides with reducing equivalents provided through the thioredoxin system. It is not able to receive electrons from glutaredoxin. May play an important role in eliminating peroxides generated during metabolism. Might participate in the signaling cascades of growth factors and tumor necrosis factor-alpha by regulating the intrace…
		ATP5H	ATP synthase, H+ transporting, mitochondrial Fo complex, subunit d; Mitochondrial membrane ATP synthase (F(1)F(0) ATP synthase or Complex V) produces ATP from ADP in the presence of a proton gradient across the membrane which is generated by electron transport complexes of the respiratory chain. F-type ATPases consist of two structural domains, F(1) - containing the extramembraneous catalytic cor…
		GSDMA	gasdermin A; Induces apoptosis (445 aa)
		RPS9	ribosomal protein S9 (194 aa)
		TMED10	transmembrane emp24-like trafficking protein 10 (yeast); Involved in vesicular protein trafficking. Mainly functions in the early secretory pathway. Thought to act as cargo receptor at the lumenal side for incorporation of secretory cargo molecules into transport vesicles and to be involved in vesicle coat formation at the cytoplasmic side. In COPII vesicle-mediated anterograde transport involved…
		MTCH2	mitochondrial carrier 2; The substrate transported is not yet known. Induces mitochondrial depolarization (303 aa)
		ITGB1	integrin, beta 1 (fibronectin receptor, beta polypeptide, antigen CD29 includes MDF2, MSK12) (798 aa)
		TMEM43	transmembrane protein 43; May have an important role in maintaining nuclear envelope structure by organizing protein complexes at the inner nuclear membrane. Required for retaining emerin at the inner nuclear membrane (By similarity) (400 aa)
		PCBP1	poly(rC) binding protein 1; Single-stranded nucleic acid binding protein that binds preferentially to oligo dC (356 aa)
		ARF4	ADP-ribosylation factor 4; GTP-binding protein that functions as an allosteric activator of the cholera toxin catalytic subunit, an ADP- ribosyltransferase. Involved in protein trafficking; may modulate vesicle budding and uncoating within the Golgi apparatus (180 aa)
		SPRR1B	small proline-rich protein 1B; Cross-linked envelope protein of keratinocytes. It is a keratinocyte protein that first appears in the cell cytosol, but ultimately becomes cross-linked to membrane proteins by transglutaminase. All that results in the formation of an insoluble envelope beneath the plasma membrane. Can function as both amine donor and acceptor in transglutaminase-mediated cross- lin…
		TBL2	transducin (beta)-like 2 (447 aa)
		SCAMP3	secretory carrier membrane protein 3; Functions in post-Golgi recycling pathways. Acts as a recycling carrier to the cell surface (347 aa)
		EEF2	eukaryotic translation elongation factor 2; Catalyzes the GTP-dependent ribosomal translocation step during translation elongation. During this step, the ribosome changes from the pre-translocational (PRE) to the post- translocational (POST) state as the newly formed A-site-bound peptidyl-tRNA and P-site-bound deacylated tRNA move to the P and E sites, respectively. Catalyzes the coordinated move…
		MMP14	matrix metallopeptidase 14 (membrane-inserted); Seems to specifically activate progelatinase A. May thus trigger invasion by tumor cells by activating progelatinase A on the tumor cell surface. May be involved in actin cytoskeleton reorganization by cleaving PTK7. Acts as a positive regulator of cell growth and migration via activation of MMP15 (582 aa)
		PSMD1	proteasome (prosome, macropain) 26S subunit, non-ATPase, 1 (953 aa)
		YWHAZ	tyrosine 3-monooxygenase/tryptophan 5-monooxygenase activation protein, zeta polypeptide (245 aa)
		CFL1	cofilin 1 (non-muscle); Binds to F-actin and exhibits pH-sensitive F-actin depolymerizing activity. Regulates actin cytoskeleton dynamics. Important for normal progress through mitosis and normal cytokinesis. Plays a role in the regulation of cell morphology and cytoskeletal organization (166 aa)
		RPL38	ribosomal protein L38 (70 aa)
		PSMD2	proteasome (prosome, macropain) 26S subunit, non-ATPase, 2; Acts as a regulatory subunit of the 26 proteasome which is involved in the ATP-dependent degradation of ubiquitinated proteins (908 aa)
		HPCAL1	hippocalcin-like 1; May be involved in the calcium-dependent regulation of rhodopsin phosphorylation (193 aa)
		RPS14	ribosomal protein S14 (151 aa)
		USMG5	up-regulated during skeletal muscle growth 5 homolog (mouse); Plays a critical role in maintaining the ATP synthase population in mitochondria (58 aa)
		CST6	cystatin E/M; Shows moderate inhibition of cathepsin B but is not active against cathepsin C (149 aa)
		PRKDC	protein kinase, DNA-activated, catalytic polypeptide (4127 aa)
		DNAJA2	DnaJ (Hsp40) homolog, subfamily A, member 2; Co-chaperone of Hsc70 (412 aa)
		TOLLIP	toll interacting protein; Component of the signaling pathway of IL-1 and Toll-like receptors. Inhibits cell activation by microbial products. Recruits IRAK1 to the IL-1 receptor complex. Inhibits IRAK1 phosphorylation and kinase activity (274 aa)
		ALOXE3	arachidonate lipoxygenase 3; Introduces molecular oxygen into polyunsaturated fatty acids. Exact substrate is not known (843 aa)
		ALOX12B	arachidonate 12-lipoxygenase, 12R type; Converts arachidonic acid to 12R- hydroperoxyeicosatetraenoic acid (12R-HPETE) (701 aa)
		CALML3	calmodulin-like 3; May be similar to that of authentic calmodulin and may actually compete with calmodulin by binding, with different affinities, to cellular substrates (149 aa)
		HNRNPA0	heterogeneous nuclear ribonucleoprotein A0; mRNA-binding component of ribonucleosomes. Specifically binds AU-rich element (ARE)-containing mRNAs. Involved in post- transcriptional regulation of cytokines mRNAs (305 aa)
		SCD5	stearoyl-CoA desaturase 5; Fatty acid delta-9-desaturase that introduces a double bond in fatty acyl-coenzyme A at the delta-9 position (330 aa)
		SSR4	signal sequence receptor, delta; TRAP proteins are part of a complex whose function is to bind calcium to the ER membrane and thereby regulate the retention of ER resident proteins (173 aa)
		TCP1	t-complex 1; Molecular chaperone; assists the folding of proteins upon ATP hydrolysis. As part of the BBS/CCT complex may play a role in the assembly of BBSome, a complex involved in ciliogenesis regulating transports vesicles to the cilia. Known to play a role, in vitro, in the folding of actin and tubulin (556 aa)
		RPS15A	ribosomal protein S15a (130 aa)
		HSPH1	heat shock 105kDa/110kDa protein 1; Prevents the aggregation of denatured proteins in cells under severe stress, on which the ATP levels decrease markedly. Inhibits HSPA8/HSC70 ATPase and chaperone activities (By similarity) (858 aa)
		TUBB6	tubulin, beta 6 class V; Tubulin is the major constituent of microtubules. It binds two moles of GTP, one at an exchangeable site on the beta chain and one at a non-exchangeable site on the alpha chain (By similarity) (446 aa)
		PRMT5	protein arginine methyltransferase 5; Arginine methyltransferase that can both catalyze the formation of omega-N monomethylarginine (MMA) and symmetrical dimethylarginine (sDMA), with a preference for the formation of MMA. Specifically mediates the symmetrical dimethylation of arginine residues in the small nuclear ribonucleoproteins Sm D1 (SNRPD1) and Sm D3 (SNRPD3); such methylation being requi…
		USH1G	Usher syndrome 1G (autosomal recessive); Required for normal development and maintenance of cochlear hair cell bundles. Anchoring/scaffolding protein that is a part of the functional network formed by USH1C, USH1G, CDH23 and MYO7A that mediates mechanotransduction in cochlear hair cells. Required for normal hearing (461 aa)
		PKM	pyruvate kinase, muscle (531 aa)
		SLC25A22	solute carrier family 25 (mitochondrial carrier- glutamate), member 22 (323 aa)
		HSPA5	heat shock 70kDa protein 5 (glucose-regulated protein, 78kDa); Probably plays a role in facilitating the assembly of multimeric protein complexes inside the ER (654 aa)
		HSP90AB1	heat shock protein 90kDa alpha (cytosolic), class B member 1; Molecular chaperone that promotes the maturation, structural maintenance and proper regulation of specific target proteins involved for instance in cell cycle control and signal transduction. Undergoes a functional cycle that is linked to its ATPase activity. This cycle probably induces conformational changes in the client proteins, th…
		CLGN	calmegin; Probably plays an important role in spermatogenesis. Binds calcium ions (610 aa)
		MDH2	malate dehydrogenase 2, NAD (mitochondrial) (338 aa)
		P4HB	prolyl 4-hydroxylase, beta polypeptide; This multifunctional protein catalyzes the formation, breakage and rearrangement of disulfide bonds. At the cell surface, seems to act as a reductase that cleaves disulfide bonds of proteins attached to the cell. May therefore cause structural modifications of exofacial proteins. Inside the cell, seems to form/rearrange disulfide bonds of nascent proteins. …
		SRPR	signal recognition particle receptor (docking protein); Component of the SRP (signal recognition particle) receptor. Ensures, in conjunction with the signal recognition particle, the correct targeting of the nascent secretory proteins to the endoplasmic reticulum membrane system (638 aa)
		KRT79	keratin 79 (535 aa)
		HAX1	HCLS1 associated protein X-1; Promotes cell survival. Potentiates GNA13-mediated cell migration. Involved in the clathrin-mediated endocytosis pathway. May be involved in internalization of ABC transporters such as ABCB11. May inhibit CASP9 and CASP3. May regulate intracellular calcium pools (279 aa)
		KRT36	keratin 36 (467 aa)
		KDELR1	KDEL (Lys-Asp-Glu-Leu) endoplasmic reticulum protein retention receptor 1; Required for the retention of luminal endoplasmic reticulum proteins. Determines the specificity of the luminal ER protein retention system. Also required for normal vesicular traffic through the Golgi. This receptor recognizes K-D-E-L (212 aa)
		TMED9	transmembrane emp24 protein transport domain containing 9; Appears to be involved in vesicular protein trafficking, mainly in the early secretory pathway. In COPI vesicle-mediated retrograde transport involved in the coatomer recruitment to membranes of the early secretory pathway. Increases coatomer- dependent activity of ARFGAP2. Thought to play a crucial role in the specific retention of p24 c…
		RPS27L	ribosomal protein S27-like (84 aa)
		EEF1G	eukaryotic translation elongation factor 1 gamma; Probably plays a role in anchoring the complex to other cellular components (437 aa)
		BSG	basigin (Ok blood group); Plays pivotal roles in spermatogenesis, embryo implantation, neural network formation and tumor progression. Stimulates adjacent fibroblasts to produce matrix metalloproteinases (MMPS). May target monocarboxylate transporters SLC16A1, SLC16A3 and SLC16A8 to plasma membranes of retinal pigment epithelium and neural retina. Seems to be a receptor for oligomannosidic glycan…
		HBB	hemoglobin, beta (147 aa)
		CHP1	calcineurin-like EF hand protein 1; Calcium-binding protein involved in different processes such as regulation of vesicular trafficking, plasma membrane Na(+)/H(+) exchanger and gene transcription. Involved in the constitutive exocytic membrane traffic. Mediates the association between microtubules and membrane-bound organelles of the endoplasmic reticulum and Golgi apparatus and is also required…
		DDX3Y	DEAD (Asp-Glu-Ala-Asp) box polypeptide 3, Y-linked; Probable ATP-dependent RNA helicase. May play a role in spermatogenesis (660 aa)
		TUBA1B	tubulin, alpha 1b; Tubulin is the major constituent of microtubules. It binds two moles of GTP, one at an exchangeable site on the beta chain and one at a non-exchangeable site on the alpha chain (By similarity) (451 aa)
		ALDOA	aldolase A, fructose-bisphosphate; Plays a key role in glycolysis and gluconeogenesis. In addition, may also function as scaffolding protein (By similarity) (364 aa)
		CLPTM1	cleft lip and palate associated transmembrane protein 1; May play a role in T-cell development (By similarity) (669 aa)
		SEC62	SEC62 homolog (S. cerevisiae); Required for preprotein translocation (By similarity) (399 aa)
		RTN4	reticulon 4 (1192 aa)
		DNAJB2	DnaJ (Hsp40) homolog, subfamily B, member 2 (324 aa)
		HNRNPF	heterogeneous nuclear ribonucleoprotein F; Component of the heterogeneous nuclear ribonucleoprotein (hnRNP) complexes which provide the substrate for the processing events that pre-mRNAs undergo before becoming functional, translatable mRNAs in the cytoplasm. Plays a role in the regulation of alternative splicing events. Binds G-rich sequences in pre-mRNAs and keeps target RNA in an unfolded stat…
		EZR	ezrin; Probably involved in connections of major cytoskeletal structures to the plasma membrane. In epithelial cells, required for the formation of microvilli and membrane ruffles on the apical pole. Along with PLEKHG6, required for normal macropinocytosis (586 aa)
		TUBB	tubulin, beta class I (444 aa)
		CAV1	caveolin 1, caveolae protein, 22kDa; May act as a scaffolding protein within caveolar membranes. Interacts directly with G-protein alpha subunits and can functionally regulate their activity (By similarity). Involved in the costimulatory signal essential for T-cell receptor (TCR)- mediated T-cell activation. Its binding to DPP4 induces T-cell proliferation and NF-kappa-B activation in a T-cell re…
		NDUFA4	NADH dehydrogenase (ubiquinone) 1 alpha subcomplex, 4, 9kDa; Accessory subunit of the mitochondrial membrane respiratory chain NADH dehydrogenase (Complex I), that is believed to be not involved in catalysis. Complex I functions in the transfer of electrons from NADH to the respiratory chain. The immediate electron acceptor for the enzyme is believed to be ubiquinone (81 aa)
		HSPD1	heat shock 60kDa protein 1 (chaperonin); Implicated in mitochondrial protein import and macromolecular assembly. May facilitate the correct folding of imported proteins. May also prevent misfolding and promote the refolding and proper assembly of unfolded polypeptides generated under stress conditions in the mitochondrial matrix (573 aa)
		GANAB	glucosidase, alpha; neutral AB; Cleaves sequentially the 2 innermost alpha-1,3-linked glucose residues from the Glc(2)Man(9)GlcNAc(2) oligosaccharide precursor of immature glycoproteins (966 aa)
		SFN	stratifin; Adapter protein implicated in the regulation of a large spectrum of both general and specialized signaling pathways. Binds to a large number of partners, usually by recognition of a phosphoserine or phosphothreonine motif. Binding generally results in the modulation of the activity of the binding partner. When bound to KRT17, regulates protein synthesis and epithelial cell growth by st…
		TUBB4B	tubulin, beta 4B class IVb; Tubulin is the major constituent of microtubules. It binds two moles of GTP, one at an exchangeable site on the beta chain and one at a non-exchangeable site on the alpha chain (By similarity) (445 aa)
		RPS2	ribosomal protein S2 (293 aa)
		SERPINA12	serpin peptidase inhibitor, clade A (alpha-1 antiproteinase, antitrypsin), member 12; May modulate insulin action conceivably only in the presence of its yet undefined target proteases in white adipose tissues (414 aa)
		NCCRP1	non-specific cytotoxic cell receptor protein 1 homolog (zebrafish); Promotes cell proliferation (275 aa)
		RTN3	reticulon 3 (1013 aa)
		ACACA	acetyl-CoA carboxylase alpha (2383 aa)
		DNAJB12	DnaJ (Hsp40) homolog, subfamily B, member 12 (409 aa)
		SLC25A10	solute carrier family 25 (mitochondrial carrier; dicarboxylate transporter), member 10; Involved in translocation of malonate, malate and succinate in exchange for phosphate, sulfate, sulfite or thiosulfate across mitochondrial inner membrane (287 aa)
		VAPA	VAMP (vesicle-associated membrane protein)-associated protein A, 33kDa; May play a role in vesicle trafficking (294 aa)
		RPL3	ribosomal protein L3; The L3 protein is a component of the large subunit of cytoplasmic ribosomes (403 aa)
		BPIFA1	BPI fold containing family A, member 1; May be involved in the airway inflammatory response after exposure to irritants. May be associated with tumor progression. May play a role in innate immune responses of the upper airways (256 aa)
		HNRNPA2B1	heterogeneous nuclear ribonucleoprotein A2/B1; Involved with pre-mRNA processing. Forms complexes (ribonucleosomes) with at least 20 other different hnRNP and heterogeneous nuclear RNA in the nucleus (353 aa)
		SND1	staphylococcal nuclease and tudor domain containing 1; Functions as a bridging factor between STAT6 and the basal transcription factor. Plays a role in PIM1 regulation of MYB activity. Functions as a transcriptional coactivator for the Epstein-Barr virus nuclear antigen 2 (EBNA2) (910 aa)
		DHCR7	7-dehydrocholesterol reductase; Production of cholesterol by reduction of C7-C8 double bond of 7-dehydrocholesterol (7-DHC) (475 aa)
		PSMD12	proteasome (prosome, macropain) 26S subunit, non-ATPase, 12; Acts as a regulatory subunit of the 26S proteasome which is involved in the ATP-dependent degradation of ubiquitinated proteins (456 aa)
		EML6	echinoderm microtubule associated protein like 6; May modify the assembly dynamics of microtubules, such that microtubules are slightly longer, but more dynamic (By similarity) (1958 aa)
		RPS26	ribosomal protein S26 (115 aa)
		ATP5C1	ATP synthase, H+ transporting, mitochondrial F1 complex, gamma polypeptide 1; Mitochondrial membrane ATP synthase (F(1)F(0) ATP synthase or Complex V) produces ATP from ADP in the presence of a proton gradient across the membrane which is generated by electron transport complexes of the respiratory chain. F-type ATPases consist of two structural domains, F(1) - containing the extramembraneous cat…
		PTBP1	polypyrimidine tract binding protein 1; Plays a role in pre-mRNA splicing and in the regulation of alternative splicing events. Activates exon skipping of its own pre-mRNA during muscle cell differentiation. Binds to the polypyrimidine tract of introns. May promote RNA looping when bound to two separate polypyrimidine tracts in the same pre-mRNA. May promote the binding of U2 snRNP to pre-mRNA. C…
		GM2A	GM2 ganglioside activator; The large binding pocket can accommodate several single chain phospholipids and fatty acids, GM2A also exhibits some calcium-independent phospholipase activity (By similarity). Binds gangliosides and stimulates ganglioside GM2 degradation. It stimulates only the breakdown of ganglioside GM2 and glycolipid GA2 by beta-hexosaminidase A. It extracts single GM2 molecules fr…
		ATP13A1	ATPase type 13A1 (1204 aa)
		ACSL3	acyl-CoA synthetase long-chain family member 3; Acyl-CoA synthetases (ACSL) activates long-chain fatty acids for both synthesis of cellular lipids, and degradation via beta-oxidation. ACSL3 mediates hepatic lipogenesis (By similarity). Preferentially uses myristate, laurate, arachidonate and eicosapentaenoate as substrates (By similarity). Has mainly an anabolic role in energy metabolism. Require…
		TOR4A	torsin family 4, member A (423 aa)
		SERPINH1	serpin peptidase inhibitor, clade H (heat shock protein 47), member 1, (collagen binding protein 1); Binds specifically to collagen. Could be involved as a chaperone in the biosynthetic pathway of collagen (418 aa)
		VCP	valosin containing protein; Necessary for the fragmentation of Golgi stacks during mitosis and for their reassembly after mitosis. Involved in the formation of the transitional endoplasmic reticulum (tER). The transfer of membranes from the endoplasmic reticulum to the Golgi apparatus occurs via 50-70 nm transition vesicles which derive from part-rough, part-smooth transitional elements of the en…
		MYOF	myoferlin (2061 aa)
		HLA-G	major histocompatibility complex, class I, G; Involved in the presentation of foreign antigens to the immune system. Plays a role in maternal tolerance of the fetus by mediating protection from the deleterious effects of natural killer cells, cytotoxic T-lymphocytes, macrophages and mononuclear cells (338 aa)
		DSC3	desmocollin 3; Component of intercellular desmosome junctions. Involved in the interaction of plaque proteins and intermediate filaments mediating cell-cell adhesion. May contribute to epidermal cell positioning (stratification) by mediating differential adhesiveness between cells that express different isoforms (896 aa)
		C1orf68	chromosome 1 open reading frame 68 (250 aa)
		PSMB5	proteasome (prosome, macropain) subunit, beta type, 5 (263 aa)
		TGM2	transglutaminase 2 (C polypeptide, protein-glutamine-gamma-glutamyltransferase); Catalyzes the cross-linking of proteins and the conjugation of polyamines to proteins (687 aa)
		ACTA1	actin, alpha 1, skeletal muscle; Actins are highly conserved proteins that are involved in various types of cell motility and are ubiquitously expressed in all eukaryotic cells (377 aa)
		SOAT1	sterol O-acyltransferase 1; Catalyzes the formation of fatty acid-cholesterol esters. Plays a role in lipoprotein assembly and dietary cholesterol absorption. In addition to its acyltransferase activity, it may act as a ligase (550 aa)
		TPM3	tropomyosin 3; Binds to actin filaments in muscle and non-muscle cells. Plays a central role, in association with the troponin complex, in the calcium dependent regulation of vertebrate striated muscle contraction. Smooth muscle contraction is regulated by interaction with caldesmon. In non-muscle cells is implicated in stabilizing cytoskeleton actin filaments (285 aa)
		RAB13	RAB13, member RAS oncogene family; Could participate in polarized transport, in the assembly and/or the activity of tight junctions (203 aa)
		MARCKS	myristoylated alanine-rich protein kinase C substrate; MARCKS is the most prominent cellular substrate for protein kinase C. This protein binds calmodulin, actin, and synapsin. MARCKS is a filamentous (F) actin cross-linking protein (332 aa)
		S100A6	S100 calcium binding protein A6; May function as calcium sensor and contribute to cellular calcium signaling (Potential). May function by interacting with other proteins and indirectly play a role in the reorganization of the actin cytoskeleton and in cell motility. Binds 2 calcium ions. Calcium binding is cooperative (90 aa)
		S100A7	S100 calcium binding protein A7 (101 aa)
		SPRR2E	small proline-rich protein 2E; Cross-linked envelope protein of keratinocytes. It is a keratinocyte protein that first appears in the cell cytosol, but ultimately becomes cross-linked to membrane proteins by transglutaminase. All that results in the formation of an insoluble envelope beneath the plasma membrane (72 aa)
		IVL	involucrin; Part of the insoluble cornified cell envelope (CE) of stratified squamous epithelia (By similarity) (585 aa)
		SNX27	sorting nexin family member 27 (528 aa)
		PSMD4	proteasome (prosome, macropain) 26S subunit, non-ATPase, 4; Binds and presumably selects ubiquitin-conjugates for destruction. Displays selectivity for longer polyubiquitin chains. Modulates intestinal fluid secretion (377 aa)
		ECM1	extracellular matrix protein 1 (567 aa)
		PHGDH	phosphoglycerate dehydrogenase (533 aa)
		SLC16A1	solute carrier family 16, member 1 (monocarboxylic acid transporter 1); Proton-linked monocarboxylate transporter. Catalyzes the rapid transport across the plasma membrane of many monocarboxylates such as lactate, pyruvate, branched-chain oxo acids derived from leucine, valine and isoleucine, and the ketone bodies acetoacetate, beta-hydroxybutyrate and acetate (500 aa)
		ATP5F1	ATP synthase, H+ transporting, mitochondrial Fo complex, subunit B1; Mitochondrial membrane ATP synthase (F(1)F(0) ATP synthase or Complex V) produces ATP from ADP in the presence of a proton gradient across the membrane which is generated by electron transport complexes of the respiratory chain. F-type ATPases consist of two structural domains, F(1) - containing the extramembraneous catalytic co…
		EMD	emerin; Stabilizes and promotes the formation of a nuclear actin cortical network. Stimulates actin polymerization in vitro by binding and stabilizing the pointed end of growing filaments. Inhibits beta-catenin activity by preventing its accumulation in the nucleus. Acts by influencing the nuclear accumulation of beta- catenin through a CRM1-dependent export pathway. Links centrosomes to the nucl…
		BAG2	BCL2-associated athanogene 2; Inhibits the chaperone activity of HSP70/HSC70 by promoting substrate release (211 aa)
		DNAJB4	DnaJ (Hsp40) homolog, subfamily B, member 4; Probable chaperone (337 aa)
		PSMA7	proteasome (prosome, macropain) subunit, alpha type, 7; The proteasome is a multicatalytic proteinase complex which is characterized by its ability to cleave peptides with Arg, Phe, Tyr, Leu, and Glu adjacent to the leaving group at neutral or slightly basic pH. The proteasome has an ATP-dependent proteolytic activity. Plays an important role in the regulation of cell proliferation or cell cycle …
		TM9SF3	transmembrane 9 superfamily member 3 (589 aa)
		DHCR24	24-dehydrocholesterol reductase; Catalyzes the reduction of the delta-24 double bond of sterol intermediates. Protects cells from oxidative stress by reducing caspase 3 activity during apoptosis induced by oxidative stress. Also protects against amyloid-beta peptide-induced apoptosis (516 aa)
		SLC25A5	solute carrier family 25 (mitochondrial carrier; adenine nucleotide translocator), member 5; Catalyzes the exchange of cytoplasmic ADP with mitochondrial ATP across the mitochondrial inner membrane. As part of the mitotic spindle-associated MMXD complex it may play a role in chromosome segregation (298 aa)
		PTPN1	protein tyrosine phosphatase, non-receptor type 1; Tyrosine-protein phosphatase which acts as a regulator of endoplasmic reticulum unfolded protein response. Mediates dephosphorylation of EIF2AK3/PERK; inactivating the protein kinase activity of EIF2AK3/PERK. May play an important role in CKII- and p60c-src-induced signal transduction cascades. May regulate the EFNA5-EPHA3 signaling pathway which…
		SURF4	surfeit 4; May play a role in the maintenance of the architecture of the endoplasmic reticulum-Golgi intermediate compartment and of the Golgi (269 aa)
		ELOVL1	ELOVL fatty acid elongase 1; Condensing enzyme that catalyzes the synthesis of both saturated and monounsaturated very long chain fatty acids. Exhibits activity toward saturated C18 to C26 acyl-CoA substrates, with the highest activity towards C22-0 acyl-CoA. Important for saturated C24-0 and monounsaturated C24-1 sphingolipid synthesis (279 aa)
		VDAC2	voltage-dependent anion channel 2; Forms a channel through the mitochondrial outer membrane that allows diffusion of small hydrophilic molecules. The channel adopts an open conformation at low or zero membrane potential and a closed conformation at potentials above 30-40 mV. The open state has a weak anion selectivity whereas the closed state is cation- selective (309 aa)
		SET	SET nuclear oncogene; Multitasking protein, involved in apoptosis, transcription, nucleosome assembly and histone chaperoning. Isoform 2 anti-apoptotic activity is mediated by inhibition of the GZMA-activated DNase, NME1. In the course of cytotoxic T- lymphocyte (CTL)-induced apoptosis, GZMA cleaves SET, disrupting its binding to NME1 and releasing NME1 inhibition. Isoform 1 and isoform 2 are pot…
		RPS4X	ribosomal protein S4, X-linked (263 aa)
		GSN	gelsolin; Calcium-regulated, actin-modulating protein that binds to the plus (or barbed) ends of actin monomers or filaments, preventing monomer exchange (end-blocking or capping). It can promote the assembly of monomers into filaments (nucleation) as well as sever filaments already formed. Plays a role in ciliogenesis (782 aa)
		TXN	thioredoxin; Participates in various redox reactions through the reversible oxidation of its active center dithiol to a disulfide and catalyzes dithiol-disulfide exchange reactions. Plays a role in the reversible S-nitrosylation of cysteine residues in target proteins, and thereby contributes to the response to intracellular nitric oxide. Nitrosylates the active site Cys of CASP3 in response to n…
		RPL11	ribosomal protein L11; Binds to 5S ribosomal RNA (By similarity). Required for rRNA maturation and formation of the 60S ribosomal subunits. Promotes nucleolar location of PML (By similarity) (178 aa)
		PSMB8	proteasome (prosome, macropain) subunit, beta type, 8 (large multifunctional peptidase 7) (276 aa)
		ECE1	endothelin converting enzyme 1 (770 aa)
		DDOST	dolichyl-diphosphooligosaccharide--protein glycosyltransferase; Essential subunit of the N-oligosaccharyl transferase (OST) complex which catalyzes the transfer of a high mannose oligosaccharide from a lipid-linked oligosaccharide donor to an asparagine residue within an Asn-X-Ser/Thr consensus motif in nascent polypeptide chains (456 aa)
		HSPA1A	heat shock 70kDa protein 1A (641 aa)
		MAGED1	melanoma antigen family D, 1; Involved in the apoptotic response after nerve growth factor (NGF) binding in neuronal cells. Binds NGFR/p75NTR and antagonizes its association with NTRK1/TrkA, inhibits cell cycle progression, and facilitates NGFR-mediated apoptosis. May act as a regulator of the function of DLX family members. May regulate TP53/p53 transcriptional activity and inhibit cell prolifer…
		HNRNPK	heterogeneous nuclear ribonucleoprotein K; One of the major pre-mRNA-binding proteins. Binds tenaciously to poly(C) sequences. Likely to play a role in the nuclear metabolism of hnRNAs, particularly for pre-mRNAs that contain cytidine-rich sequences. Can also bind poly(C) single- stranded DNA. Plays an important role in p53/TP53 response to DNA damage, acting at the level of both transcription ac…
		CDSN	corneodesmosin (529 aa)
		HLA-A	major histocompatibility complex, class I, A; Involved in the presentation of foreign antigens to the immune system (By similarity) (365 aa)
		SYVN1	synovial apoptosis inhibitor 1, synoviolin; Acts as an E3 ubiquitin-protein ligase which accepts ubiquitin specifically from endoplasmic reticulum-associated UBC7 E2 ligase and transfers it to substrates, promoting their degradation. Component of the endoplasmic reticulum quality control (ERQC) system also called ER-associated degradation (ERAD) involved in ubiquitin-dependent degradation of misf…
		AUP1	ancient ubiquitous protein 1; May play a role in the translocation of terminally misfolded proteins from the endoplasmic reticulum lumen to the cytoplasm and their degradation by the proteasome (410 aa)
		SLC3A2	solute carrier family 3 (activators of dibasic and neutral amino acid transport), member 2; Required for the function of light chain amino-acid transporters. Involved in sodium-independent, high-affinity transport of large neutral amino acids such as phenylalanine, tyrosine, leucine, arginine and tryptophan. Involved in guiding and targeting of LAT1 and LAT2 to the plasma membrane. When associate…
		AHNAK	AHNAK nucleoprotein; May be required for neuronal cell differentiation (5890 aa)
		CKAP4	cytoskeleton-associated protein 4; High-affinity epithelial cell surface receptor for APF (602 aa)
		ATP6AP2	ATPase, H+ transporting, lysosomal accessory protein 2 (350 aa)
		LGALS7	lectin, galactoside-binding, soluble, 7; Could be involved in cell-cell and/or cell-matrix interactions necessary for normal growth control. Pro-apoptotic protein that functions intracellularly upstream of JNK activation and cytochrome c release (136 aa)
		ASPH	aspartate beta-hydroxylase (758 aa)
		DNAJA1	DnaJ (Hsp40) homolog, subfamily A, member 1; Co-chaperone of Hsc70. Seems to play a role in protein import into mitochondria (397 aa)
		GDI2	GDP dissociation inhibitor 2; Regulates the GDP/GTP exchange reaction of most Rab proteins by inhibiting the dissociation of GDP from them, and the subsequent binding of GTP to them (445 aa)
		CALML5	calmodulin-like 5; Binds calcium. May be involved in terminal differentiation of keratinocytes (146 aa)
		TMEM165	transmembrane protein 165 (324 aa)
		ZG16B	zymogen granule protein 16 homolog B (rat) (208 aa)
		SLC16A3	solute carrier family 16, member 3 (monocarboxylic acid transporter 4); Proton-linked monocarboxylate transporter. Catalyzes the rapid transport across the plasma membrane of many monocarboxylates such as lactate, pyruvate, branched-chain oxo acids derived from leucine, valine and isoleucine, and the ketone bodies acetoacetate, beta-hydroxybutyrate and acetate (By similarity) (465 aa)
		RAN	RAN, member RAS oncogene family (216 aa)
		STT3A	STT3, subunit of the oligosaccharyltransferase complex, homolog A (S. cerevisiae); Catalytic subunit of the N-oligosaccharyl transferase (OST) complex which catalyzes the transfer of a high mannose oligosaccharide from a lipid-linked oligosaccharide donor to an asparagine residue within an Asn-X-Ser/Thr consensus motif in nascent polypeptide chains. N-glycosylation occurs cotranslationally and th…
		CNP	2’,3’-cyclic nucleotide 3’ phosphodiesterase; May participate in RNA metabolism in the myelinating cell, CNP is the third most abundant protein in central nervous system myelin (By similarity) (421 aa)
		PC	pyruvate carboxylase; Pyruvate carboxylase catalyzes a 2-step reaction, involving the ATP-dependent carboxylation of the covalently attached biotin in the first step and the transfer of the carboxyl group to pyruvate in the second. Catalyzes in a tissue specific manner, the initial reactions of glucose (liver, kidney) and lipid (adipose tissue, liver, brain) synthesis from pyruvate (1178 aa)
		RPL23	ribosomal protein L23 (140 aa)
		ACTN1	actinin, alpha 1; F-actin cross-linking protein which is thought to anchor actin to a variety of intracellular structures. This is a bundling protein (914 aa)
		RPS8	ribosomal protein S8 (208 aa)
		HM13	histocompatibility (minor) 13 (426 aa)
		GSTP1	glutathione S-transferase pi 1; Conjugation of reduced glutathione to a wide number of exogenous and endogenous hydrophobic electrophiles. Regulates negatively CDK5 activity via p25/p35 translocation to prevent neurodegeneration (210 aa)
		MYO5A	myosin VA (heavy chain 12, myoxin); Processive actin-based motor that can move in large steps approximating the 36-nm pseudo-repeat of the actin filament. Involved in melanosome transport. Also mediates the transport of vesicles to the plasma membrane. May also be required for some polarization process involved in dendrite formation (1855 aa)
		UBAC2	UBA domain containing 2 (344 aa)
		XPO1	exportin 1 (CRM1 homolog, yeast); Mediates the nuclear export of cellular proteins (cargos) bearing a leucine-rich nuclear export signal (NES) and of RNAs. In the nucleus, in association with RANBP3, binds cooperatively to the NES on its target protein and to the GTPase RAN in its active GTP-bound form (Ran-GTP). Docking of this complex to the nuclear pore complex (NPC) is mediated through bindin…
		ERLIN1	ER lipid raft associated 1; Component of the ERLIN1/ERLIN2 complex which mediates the endoplasmic reticulum-associated degradation (ERAD) of inositol 1,4,5-trisphosphate receptors (IP3Rs) (348 aa)
		ELAVL1	ELAV (embryonic lethal, abnormal vision, Drosophila)-like 1 (Hu antigen R); Involved in 3’-UTR ARE-mediated MYC stabilization. Binds avidly to the AU-rich element in FOS and IL3/interleukin-3 mRNAs. In the case of the FOS AU-rich element, HUR binds to a core element of 27 nucleotides that contain AUUUA, AUUUUA and AUUUUUA motifs. Binds preferentially to the 5’-UUUU[AG]UUU-3’ motif in vitro (326 a…
		PSMD14	proteasome (prosome, macropain) 26S subunit, non-ATPase, 14; Metalloprotease component of the 26S proteasome that specifically cleaves ’Lys-63’-linked polyubiquitin chains. The 26S proteasome is involved in the ATP-dependent degradation of ubiquitinated proteins. Plays a role in response to double-strand breaks (DSBs)- acts as a regulator of non-homologous end joining (NHEJ) by cleaving ’Lys-63’-…
		WDR81	WD repeat domain 81 (1941 aa)
		RAB1A	RAB1A, member RAS oncogene family; Probably required for transit of protein from the ER through Golgi compartment. Binds GTP and GDP and possesses intrinsic GTPase activity (205 aa)
		SLC25A12	solute carrier family 25 (aspartate/glutamate carrier), member 12; Catalyzes the calcium-dependent exchange of cytoplasmic glutamate with mitochondrial aspartate across the mitochondrial inner membrane. May have a function in the urea cycle (678 aa)
		RPL23A	ribosomal protein L23a; This protein binds to a specific region on the 26S rRNA (By similarity) (156 aa)
		RPS18	ribosomal protein S18 (152 aa)
		TMX1	thioredoxin-related transmembrane protein 1; May participate in various redox reactions through the reversible oxidation of its active center dithiol to a disulfide and catalyze dithiol-disulfide exchange reactions (280 aa)
		BZW1	basic leucine zipper and W2 domains 1; Enhances histone H4 gene transcription but does not seem to bind DNA directly (451 aa)
		HLA-B	major histocompatibility complex, class I, B; Involved in the presentation of foreign antigens to the immune system (By similarity) (362 aa)
		MAVS	mitochondrial antiviral signaling protein (540 aa)
		DNAJB14	DnaJ (Hsp40) homolog, subfamily B, member 14; May act as a co-chaperone (By similarity) (379 aa)
		TKT	transketolase; Catalyzes the transfer of a two-carbon ketol group from a ketose donor to an aldose acceptor, via a covalent intermediate with the cofactor thiamine pyrophosphate (623 aa)
		PNPLA6	patatin-like phospholipase domain containing 6; Phospholipase B that deacylates intracellular phosphatidylcholine (PtdCho), generating glycerophosphocholine (GroPtdCho). This deacylation occurs at both sn-2 and sn-1 positions of PtdCho. Its specific chemical modification by certain organophosphorus (OP) compounds leads to distal axonopathy (1375 aa)
		SLC9A3R2	solute carrier family 9, subfamily A (NHE3, cation proton antiporter 3), member 3 regulator 2; Scaffold protein that connects plasma membrane proteins with members of the ezrin/moesin/radixin family and thereby helps to link them to the actin cytoskeleton and to regulate their surface expression. Necessary for cAMP-mediated phosphorylation and inhibition of SLC9A3. May also act as scaffold protei…
		HERPUD1	homocysteine-inducible, endoplasmic reticulum stress-inducible, ubiquitin-like domain member 1; Component of the endoplasmic reticulum quality control (ERQC) system also called ER-associated degradation (ERAD) involved in ubiquitin-dependent degradation of misfolded endoplasmic reticulum proteins. Could enhance presenilin-mediated beta-amyloid protein 40 generation (391 aa)
		PSMA1	proteasome (prosome, macropain) subunit, alpha type, 1; The proteasome is a multicatalytic proteinase complex which is characterized by its ability to cleave peptides with Arg, Phe, Tyr, Leu, and Glu adjacent to the leaving group at neutral or slightly basic pH. The proteasome has an ATP-dependent proteolytic activity. Mediates the lipopolysaccharide-induced signal transduction in the macrophage …
		SLC2A1	solute carrier family 2 (facilitated glucose transporter), member 1; Facilitative glucose transporter. This isoform may be responsible for constitutive or basal glucose uptake. Has a very broad substrate specificity; can transport a wide range of aldoses including both pentoses and hexoses (492 aa)
		SRPRB	signal recognition particle receptor, B subunit; Component of the SRP (signal recognition particle) receptor. Ensures, in conjunction with the signal recognition particle, the correct targeting of the nascent secretory proteins to the endoplasmic reticulum membrane system. Has GTPase activity. May mediate the membrane association of SRPR (By similarity) (271 aa)
		PPIA	peptidylprolyl isomerase A (cyclophilin A); PPIases accelerate the folding of proteins. It catalyzes the cis-trans isomerization of proline imidic peptide bonds in oligopeptides (By similarity) (165 aa)
		EMC1	ER membrane protein complex subunit 1 (993 aa)
		TMEM33	transmembrane protein 33 (247 aa)
		GPX8	glutathione peroxidase 8 (putative) (209 aa)
		GNB2L1	guanine nucleotide binding protein (G protein), beta polypeptide 2-like 1 (317 aa)
		RPS3	ribosomal protein S3 (243 aa)
		RPS25	ribosomal protein S25 (125 aa)
		PGAM5	phosphoglycerate mutase family member 5; Displays phosphatase activity for serine/threonine residues, and, dephosphorylates and activates MAP3K5 kinase. Has apparently no phosphoglycerate mutase activity. May be regulator of mitochondrial dynamics. Substrate for a KEAP1-dependent ubiquitin ligase complex. Contributes to the repression of NFE2L2- dependent gene expression. Acts as a central mediat…
		ATP2A2	ATPase, Ca++ transporting, cardiac muscle, slow twitch 2; This magnesium-dependent enzyme catalyzes the hydrolysis of ATP coupled with the translocation of calcium from the cytosol to the sarcoplasmic reticulum lumen. Isoform 2 is involved in the regulation of the contraction/relaxation cycle (1042 aa)
		PHB2	prohibitin 2; Acts as a mediator of transcriptional repression by nuclear hormone receptors via recruitment of histone deacetylases (By similarity). Functions as an estrogen receptor (ER)-selective coregulator that potentiates the inhibitory activities of antiestrogens and represses the activity of estrogens. Competes with NCOA1 for modulation of ER transcriptional activity. Probably involved in …
		NCEH1	neutral cholesterol ester hydrolase 1; Hydrolyzes 2-acetyl monoalkylglycerol ether, the penultimate precursor of the pathway for de novo synthesis of platelet-activating factor. May be responsible for cholesterol ester hydrolysis in macrophages, thereby contributing to the development of atherosclerosis. Also involved in organ detoxification by hydrolyzing exogenous organophosphorus compounds. Ma…
		SLC1A5	solute carrier family 1 (neutral amino acid transporter), member 5 (541 aa)
		LDHA	lactate dehydrogenase A (361 aa)
		MYL6	myosin, light chain 6, alkali, smooth muscle and non-muscle; Regulatory light chain of myosin. Does not bind calcium (151 aa)
		TUBB3	tubulin, beta 3 class III; Tubulin is the major constituent of microtubules. It binds two moles of GTP, one at an exchangeable site on the beta chain and one at a non-exchangeable site on the alpha chain (By similarity) (797 aa)
